# Supplementary material
Source: PubMed Central journal article supplement (PMC2826131)
Supplement: NIHMS165888-supplement-1_si_001.pdf [file NIHMS165888-supplement-1_si_001.pdf]

# Heme-Coordinating Inhibitors of Neuronal Nitric Oxide Synthase. Iron-Thioether Coordination is Stabilized by Hydrophobic Contacts Without Increased Inhibitor Potency

Jeffrey D. Martell,<sup>†</sup> Huiying Li,<sup>‡</sup> Tzanko Doukov,<sup>¶</sup> Pavel Martíásek,<sup>§</sup> Linda J. Roman,<sup>§</sup> Michael Soltis,<sup>¶</sup> Thomas L. Poulos,<sup>‡\*</sup> and Richard B. Silverman<sup>†\*</sup>

<sup>†</sup> *Department of Chemistry, Department of Biochemistry, Molecular Biology, and Cell Biology, and Center for Molecular Innovation and Drug Discovery, Chemistry of Life Processes Institute, Northwestern University, Evanston, Illinois 60208-3113.*

<sup>‡</sup> *Departments of Molecular Biology and Biochemistry, Pharmaceutical Chemistry, and Chemistry, University of California, Irvine, California 92697-3900.*

<sup>¶</sup> *Macromolecular Crystallographic Group, Stanford Synchrotron Radiation Lightsource, SLAC, Stanford University, Stanford, California 94309*

<sup>§</sup> *Department of Biochemistry, University of Texas Health Science Center, San Antonio, TX 78384-7760.*

## CONTENTS:

|                 |                                                                                                                                                                            |
|-----------------|----------------------------------------------------------------------------------------------------------------------------------------------------------------------------|
| <b>Page S3</b>  | Supplementary Table S1: The crystallographic data collection and structure refinement statistics                                                                           |
| <b>Page S5</b>  | Supplementary Figure S1: Difference spectra and Lineweaver-Burk plots for imidazole, L-nitroarginine, <b>1</b> , and <b>5-8</b>                                            |
| <b>Page S11</b> | Supplementary Figure S2: Absolute absorption spectra for L-arginine, <b>1</b> , and <b>5-7</b> over the full visible light range                                           |
| <b>Page S14</b> | Supplementary Figure S3: Inverse titration for <b>8</b>                                                                                                                    |
| <b>Page S15</b> | Supplementary Figure S4: Active site structures of nNOS heme domain with <b>5</b> (panel A) and <b>8</b> (B) bound.                                                        |
| <b>Page S16</b> | Supplementary Figure S5: Active site structures of nNOS heme domain with <b>4</b> (panel A) and <b>5</b> (B) bound derived from data collected with the dithionite reduced |

crystals.

**Page S17** Experimental details and data for **3-20**;

**Page S28** Supplementary Figure S6: The  $^1\text{H}$ -NMR and  $^{13}\text{C}$ -NMR spectra for **3-8, 10, 12, 14, 16, 18, and 20**.

**Supplementary Table S1 Crystallographic data collection and refinement statistics**

| Data set <sup>1</sup>                                | nNOS-1                                        | nNOS-3                                        | nNOS-4                                        | nNOS-5                                        |
|------------------------------------------------------|-----------------------------------------------|-----------------------------------------------|-----------------------------------------------|-----------------------------------------------|
| <b>Data collection</b>                               |                                               |                                               |                                               |                                               |
| PDB code                                             | 3JT3                                          | 3JT4                                          | 3JT5                                          | 3JT6                                          |
| Space group                                          | P2 <sub>1</sub> 2 <sub>1</sub> 2 <sub>1</sub> |
| Cell dimensions                                      |                                               |                                               |                                               |                                               |
| <i>a</i> , <i>b</i> , <i>c</i> (Å)                   | 51.6, 111.1, 164.3                            | 52.0, 111.2, 164.3                            | 52.0, 111.2, 164.4                            | 51.8, 110.8, 164.6                            |
| Resolution (Å)                                       | 2.15(2.19-2.15)                               | 1.80(1.83-1.80)                               | 2.10(2.14-2.10)                               | 2.20(2.24-2.20)                               |
| <i>R</i> <sub>sym</sub> or <i>R</i> <sub>merge</sub> | 0.054 (0.55)                                  | 0.074 (0.47)                                  | 0.078 (0.64)                                  | 0.097 (0.59)                                  |
| <i>I</i> / $\sigma$ <i>I</i>                         | 10.4 (2.2)                                    | 12.9 (2.0)                                    | 7.9 (3.2)                                     | 7.2 (1.9)                                     |
| No. unique reflections                               | 50,880                                        | 87,410                                        | 56,332                                        | 47,686                                        |
| Completeness (%)                                     | 97.1 (86.6)                                   | 97.9 (86.2)                                   | 99.9 (100.0)                                  | 97.0 (82.5)                                   |
| Redundancy                                           | 4.4 (3.8)                                     | 5.5 (3.2)                                     | 8.1 (8.3)                                     | 3.9 (3.8)                                     |
| <b>Refinement</b>                                    |                                               |                                               |                                               |                                               |
| Resolution (Å)                                       | 2.15                                          | 1.80                                          | 2.10                                          | 2.20                                          |
| No. reflections used                                 | 48,281                                        | 82,962                                        | 53,481                                        | 45,262                                        |
| <i>R</i> <sub>work</sub> / <i>R</i> <sub>free</sub>  | 0.194/0.248                                   | 0.199/0.231                                   | 0.174/0.210                                   | 0.187/0.244                                   |
| No. atoms                                            |                                               |                                               |                                               |                                               |
| Protein                                              | 6,659                                         | 6,702                                         | 6,671                                         | 6,671                                         |
| Ligand/ion                                           | 157                                           | 161                                           | 162                                           | 161                                           |
| Water                                                | 163                                           | 432                                           | 330                                           | 200                                           |
| R.m.s. deviations                                    |                                               |                                               |                                               |                                               |
| Bond lengths (Å)                                     | 0.014                                         | 0.013                                         | 0.013                                         | 0.014                                         |
| Bond angles (°)                                      | 1.641                                         | 1.371                                         | 1.387                                         | 1.554                                         |

|                                                                  | nNOS-6                                        | nNOS-8                                        | Reduced nNOS -4                               | Reduced nNOS -5                               |
|------------------------------------------------------------------|-----------------------------------------------|-----------------------------------------------|-----------------------------------------------|-----------------------------------------------|
| <b>Data collection</b>                                           |                                               |                                               |                                               |                                               |
| PDB code                                                         | 3JT7                                          | 3JT8                                          | 3JT9                                          | 3JTA                                          |
| Space group                                                      | P2 <sub>1</sub> 2 <sub>1</sub> 2 <sub>1</sub> |
| Cell dimensions                                                  |                                               |                                               |                                               |                                               |
| <i>a</i> , <i>b</i> , <i>c</i> (Å)                               | 51.9, 110.6, 164.0                            | 52.2, 111.4, 164.7                            | 51.8, 110.9, 164.3                            | 51.8, 111.5, 164.4                            |
| Resolution (Å)                                                   | 2.10(2.14-2.10)                               | 1.95(1.98-1.95)                               | 2.10(2.14-2.10)                               | 2.18(2.22-2.18)                               |
| <i>R</i> <sub>sym</sub> or <i>R</i> <sub>merge</sub>             | 0.081 (0.49)                                  | 0.064 (0.45)                                  | 0.074(0.51)                                   | 0.069(0.44)                                   |
| <i>I</i> / $\sigma$ <i>I</i>                                     | 7.8 (1.8)                                     | 9.0 (1.7)                                     | 7.7(2.0)                                      | 9.9(1.8)                                      |
| No. unique reflections                                           | 56,046                                        | 70,347                                        | 55,755                                        | 50,917                                        |
| Completeness (%)                                                 | 99.7 (97.8)                                   | 99.1 (94.5)                                   | 99.1/99.1                                     | 99.4(95.7)                                    |
| Redundancy                                                       | 4.0 (3.6)                                     | 4.0 (3.7)                                     | 4.1/4.0                                       | 4.4(3.8)                                      |
| <b>Refinement</b>                                                |                                               |                                               |                                               |                                               |
| Resolution (Å)                                                   | 2.10                                          | 1.95                                          | 2.10                                          | 2.18                                          |
| No. reflections used                                             | 53,221                                        | 66,790                                        | 52,945                                        | 48,311                                        |
| <i>R</i> <sub>work</sub> / <i>R</i> <sub>free</sub> <sup>2</sup> | 0.171/0.213                                   | 0.187/0.222                                   | 0.185/0.228                                   | 0.195/0.243                                   |
| No. atoms                                                        |                                               |                                               |                                               |                                               |
| Protein                                                          | 6,676                                         | 6,674                                         | 6,707                                         | 6,671                                         |
| Ligand/ion                                                       | 169                                           | 157                                           | 149                                           | 161                                           |
| Water                                                            | 476                                           | 411                                           | 232                                           | 103                                           |
| R.m.s. deviations                                                |                                               |                                               |                                               |                                               |
| Bond lengths (Å)                                                 | 0.011                                         | 0.012                                         | 0.014                                         | 0.014                                         |
| Bond angles (°)                                                  | 1.302                                         | 1.334                                         | 1.467                                         | 1.517                                         |

<sup>1</sup> See Table 1 for chemical formula of inhibitors. Reduced nNOS refers to the data collected with the dithionite reduced crystals.

<sup>2</sup>  $R_{\text{free}}$  was calculated with the 5% of reflections set aside throughout the refinement. The set of reflections for the  $R_{\text{free}}$  calculation were kept the same for all data sets according to those used in the data of the starting model.

Supplementary Figure S1: Difference spectra and Lineweaver-Burk plots for imidazole, L-nitroarginine, **1**, and **5-8**

### Imidazole Ferric Heme-BH<sub>4</sub> Titration

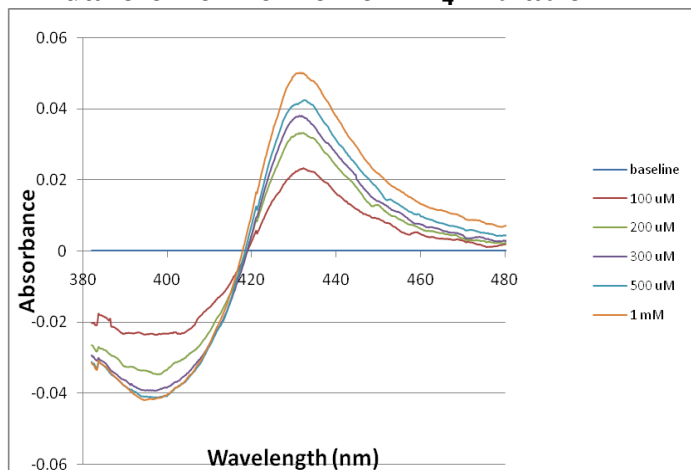

### Imidazole Ferric K<sub>s</sub> Determination

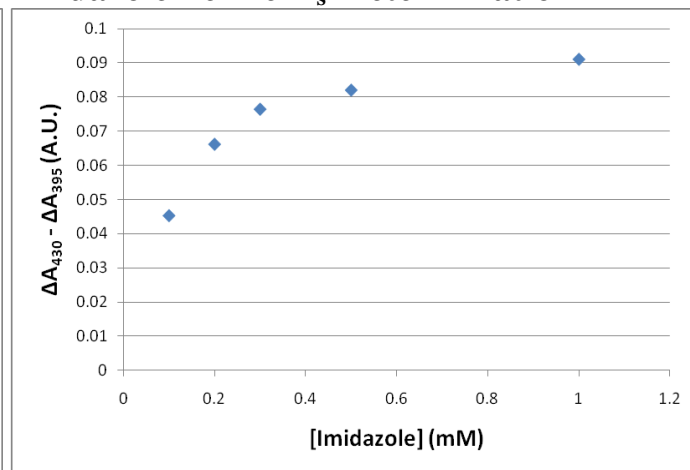

Imidazole Ferric K<sub>s</sub> = 120 ± 20 μM  
(K<sub>s</sub> from experiment depicted above: 112 μM)

### L-NNA Ferric Heme-Imidazole Titration

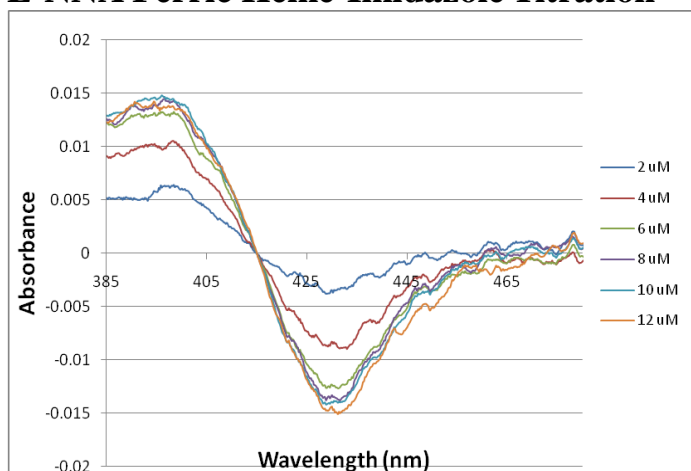

### L-NNA Ferric K<sub>s</sub> Determination

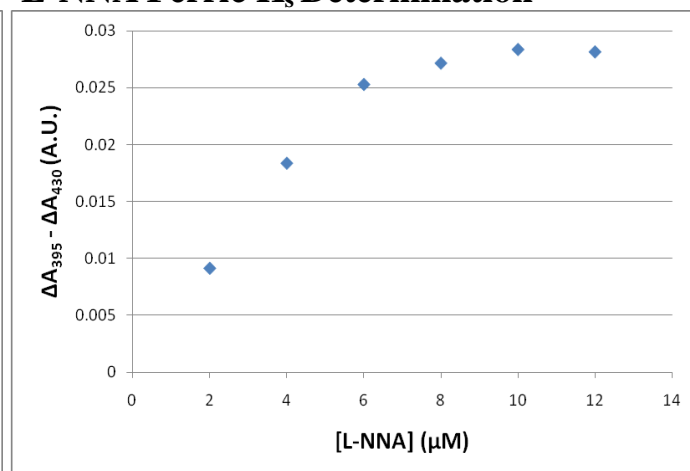

Spectra were normalized to zero absorbance at 415 nm.

The actual K<sub>s</sub> was calculated from the apparent K<sub>s</sub> as described.<sup>1</sup>

L-NNA Ferric K<sub>s</sub> = 1.07 ± 0.01  
(K<sub>s</sub> from experiment depicted above: 1.06 μM)

## Compound 1 Ferric Heme-Imidazole Titration

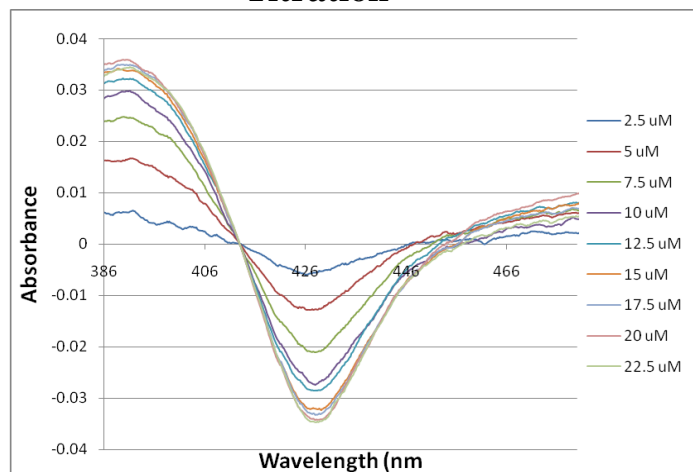

## Compound 1 Ferric $K_s$ Determination

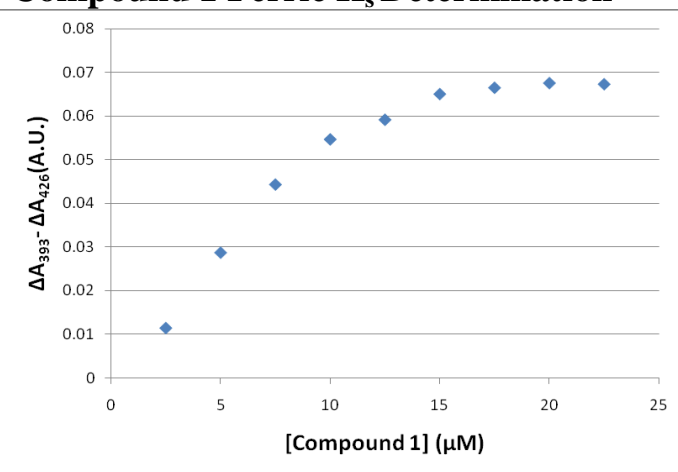

Spectra were not normalized.

Imidazole concentration was 300  $\mu\text{M}$ .

The actual  $K_s$  was calculated from the apparent  $K_s$  as described.<sup>1</sup>

Compound 1 Ferric  $K_s = 2.2 \pm 0.2 \mu\text{M}$   
( $K_s$  from experiment depicted above: 2.1  $\mu\text{M}$ )

## Compound 1 Ferrous Heme-BH<sub>4</sub> Titration

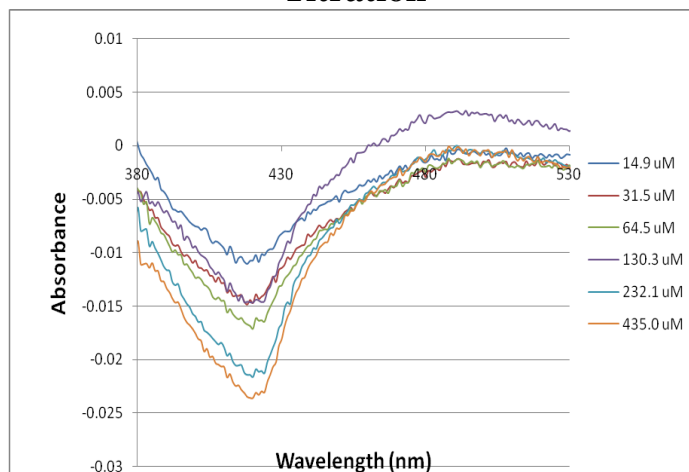

## Compound 5 Ferric Heme-Imidazole Titration

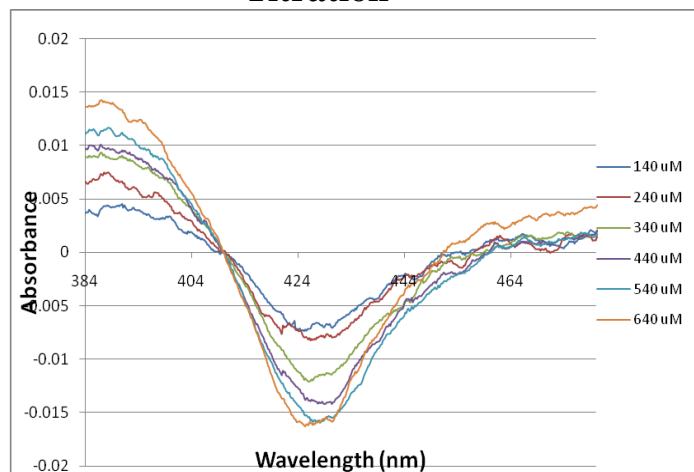

## Compound 5 Ferric $K_s$ Determination

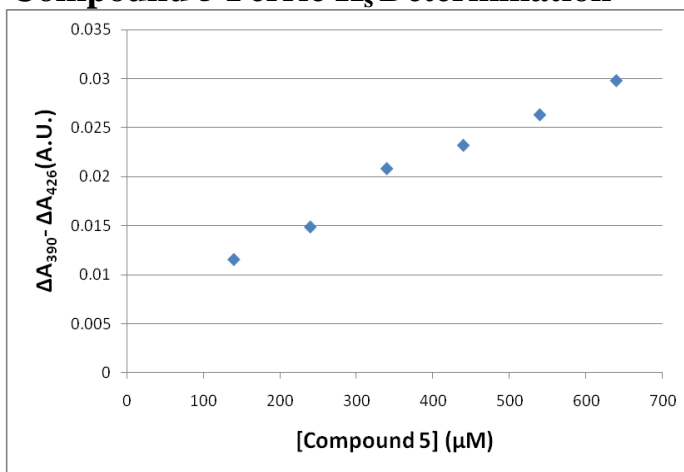

Spectra were normalized to zero absorbance at 410 nm.

Imidazole concentration was 300  $\mu\text{M}$ .

The actual  $K_s$  was calculated from the apparent  $K_s$  as described.<sup>1</sup>

Compound 5 Ferric  $K_s = 170 \pm 10 \mu\text{M}$   
( $K_s$  calculated from the experiment depicted above: 180  $\mu\text{M}$ )

## Compound 5 Ferrous Heme- $\text{BH}_4$ Titration

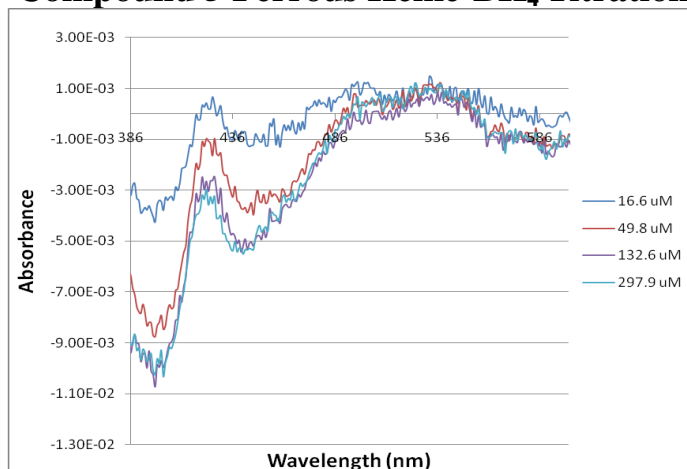

### Compound 6 Ferric Heme-Imidazole Titration

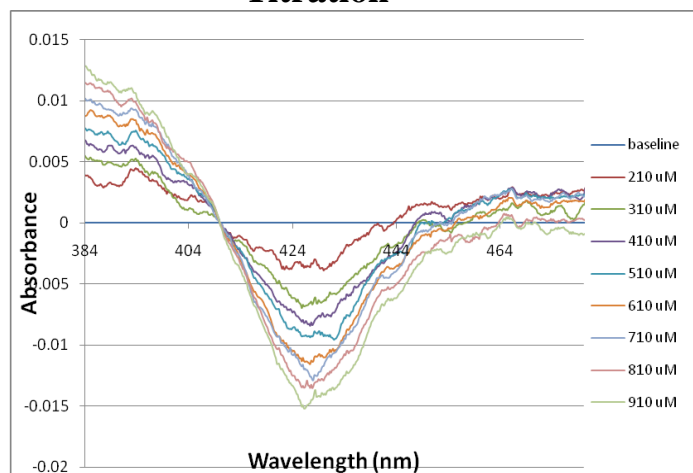

### Compound 6 Ferric $K_s$ Determination

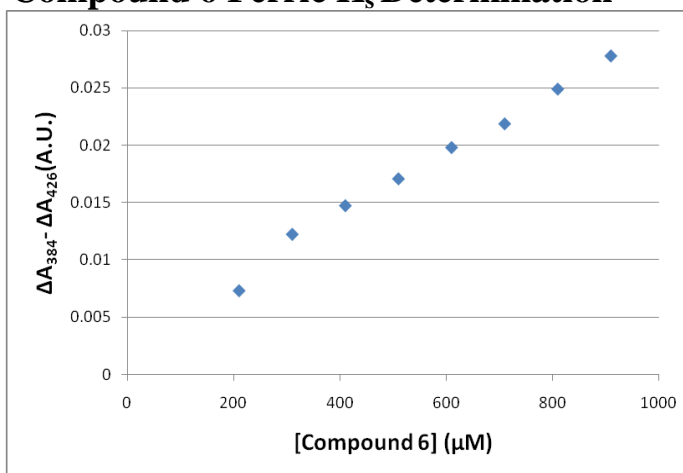

Spectra were normalized to zero absorbance at 410 nm.

Imidazole concentration was 300  $\mu\text{M}$ .

The actual  $K_s$  was calculated from the apparent  $K_s$  as described.<sup>1</sup>

Compound 6 Ferric  $K_s = 550 \pm 50 \mu\text{M}$   
 ( $K_s$  calculated from the experiment depicted above: 570  $\mu\text{M}$ )

### Compound 6 Ferrous Heme-BH<sub>4</sub> Titration

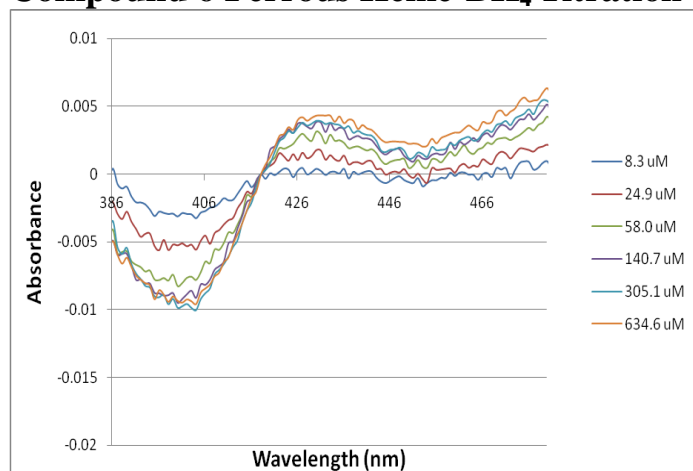

### Compound 6 Ferrous $K_s$ Determination

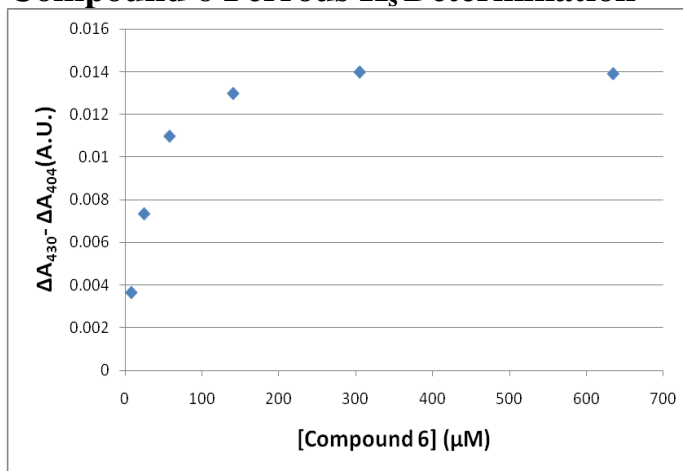

Spectra were normalized to zero absorbance at 418 nm.

Compound 6 Ferrous  $K_s = 22 \pm 2 \mu\text{M}$   
 ( $K_s$  calculated from the experiment depicted above: 20.  $\mu\text{M}$ )



## Compound 7 Ferric Heme-Imidazole Titration

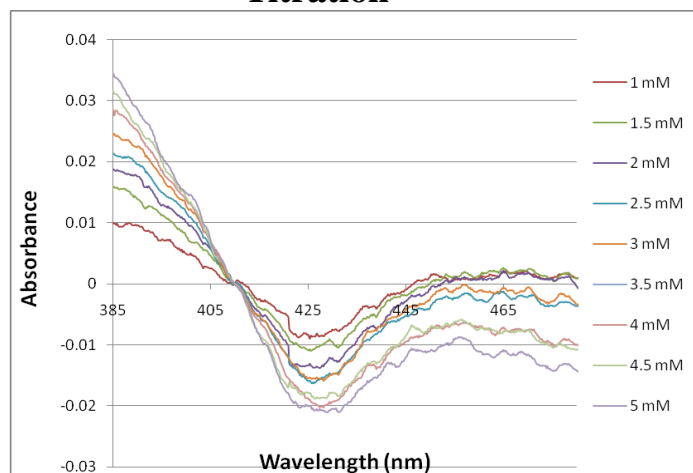

## Compound 7 Ferric $K_s$ Determination

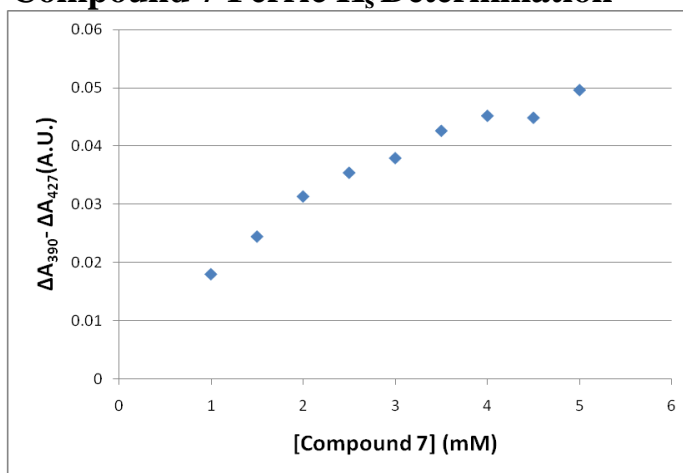

Spectra were normalized to zero absorbance at 410 nm.

Imidazole concentration was 10  $\mu\text{M}$ .

Absorption due to **7** was subtracted out for each curve, and the absorptions were scaled to account for volume change.

The actual  $K_s$  was calculated from the apparent  $K_s$  as described.<sup>1</sup>

Compound 7 Ferric  $K_s = 1940 \pm 90 \mu\text{M}$   
( $K_s$  from experiment depicted above: 2010  $\mu\text{M}$ )

## Compound 7 Ferrous Heme-BH<sub>4</sub> Titration

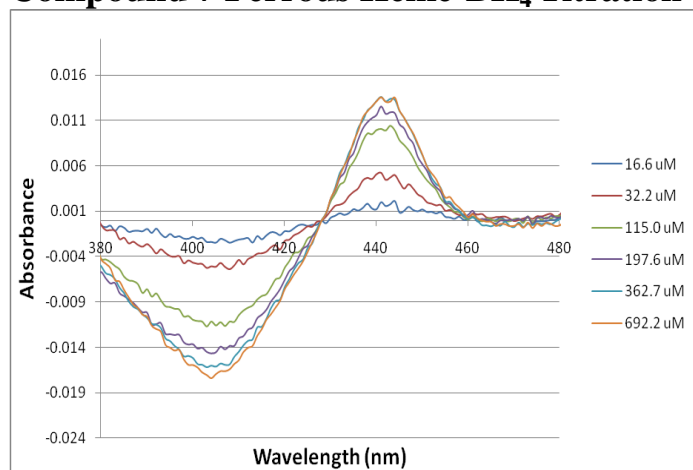

## Compound 7 Ferrous $K_s$ Determination

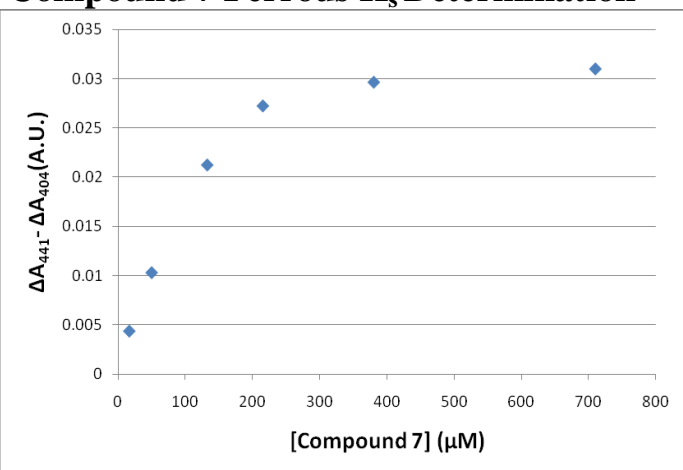

Spectra were normalized to zero absorbance at 428 nm.

Compound 7 Ferrous  $K_s = 110. \pm 9 \mu\text{M}$   
( $K_s$  from experiment depicted above: 104  $\mu\text{M}$ )

## Compound 8 Ferric Heme-Imidazole Titration

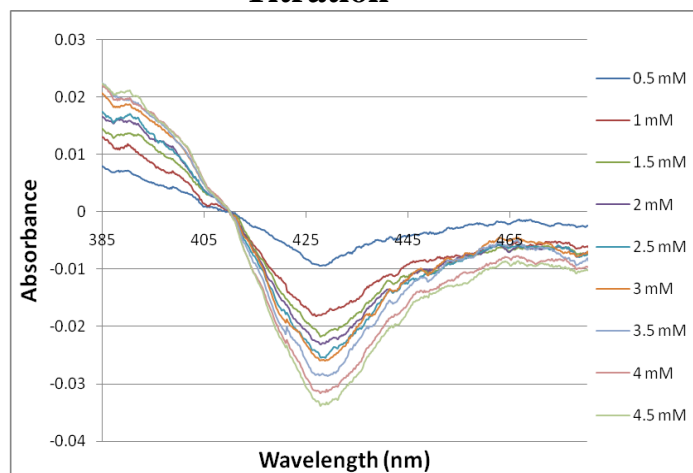

## Compound 8 Ferric $K_s$ Determination

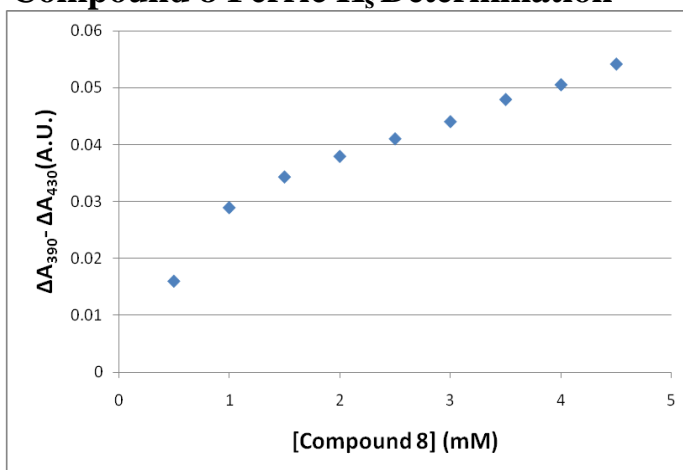

Spectra were normalized to zero absorbance at 410 nm.

Imidazole concentration was 100  $\mu\text{M}$ .

Absorption due to **8** was subtracted out for each curve, and the absorptions were scaled to account for volume change.

The actual  $K_s$  was calculated from the apparent  $K_s$  as described.<sup>1</sup>

Apparent Compound 8 Ferric  $K_s = 1010 \pm 40 \mu\text{M}$   
(Apparent  $K_s$  from experiment depicted above: 990  $\mu\text{M}$ )

## Compound 8 Ferrous Heme-BH<sub>4</sub> Titration Compound 8 Ferrous $K_s$ Determination

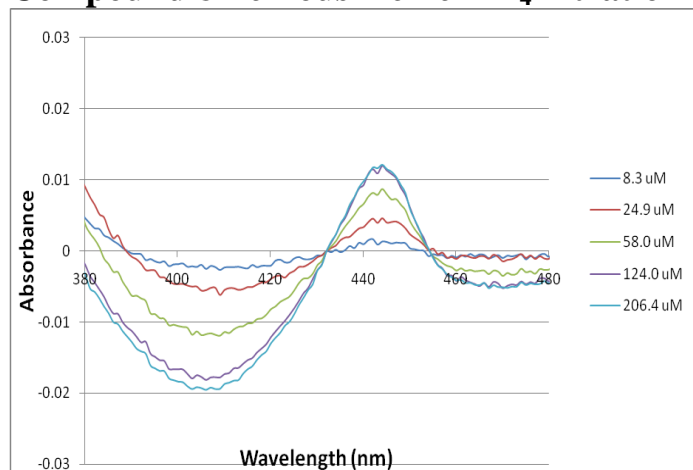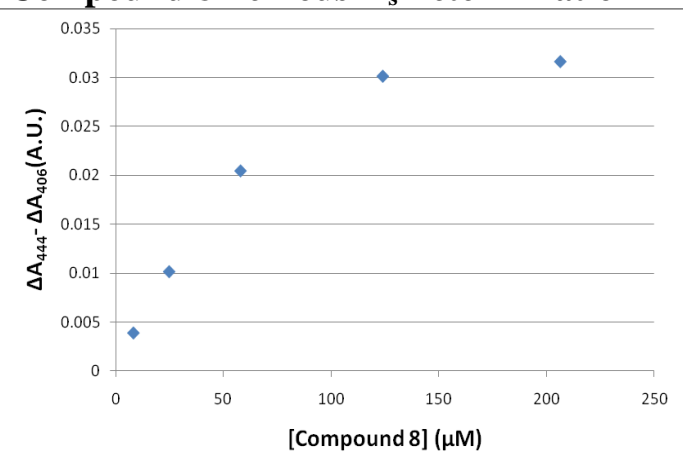

Spectra were normalized to zero absorbance at 432 nm.

Compound 8 Ferrous  $K_s = 77 \pm 8 \mu\text{M}$   
( $K_s$  from experiment depicted above: 82  $\mu\text{M}$ )

Supplementary Figure S2: Absolute absorption spectra for L-arginine (control), **1**, and **5-7** over the full visible light range.

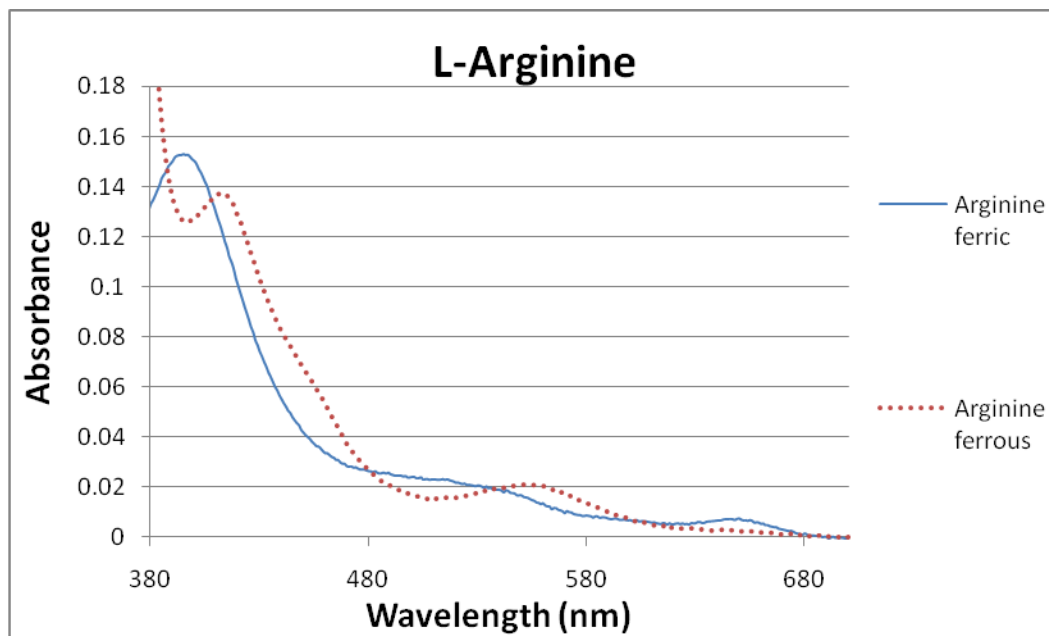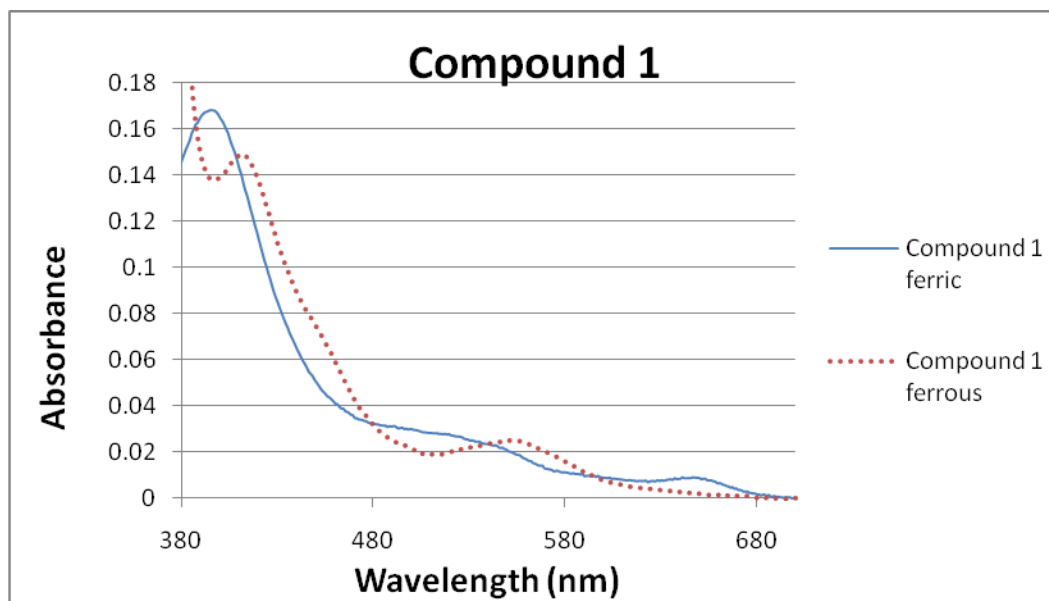

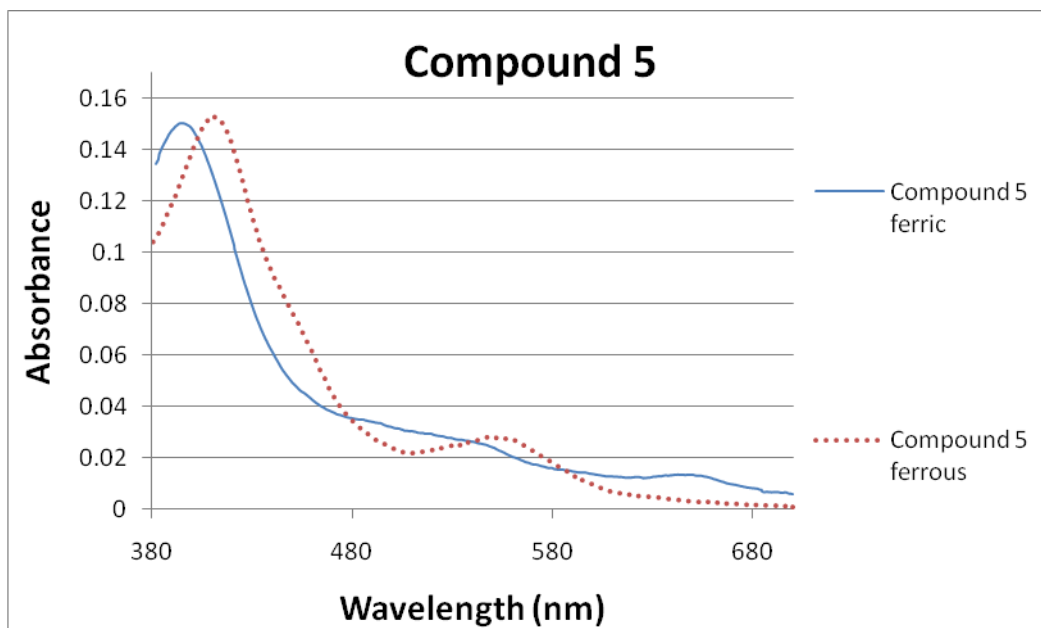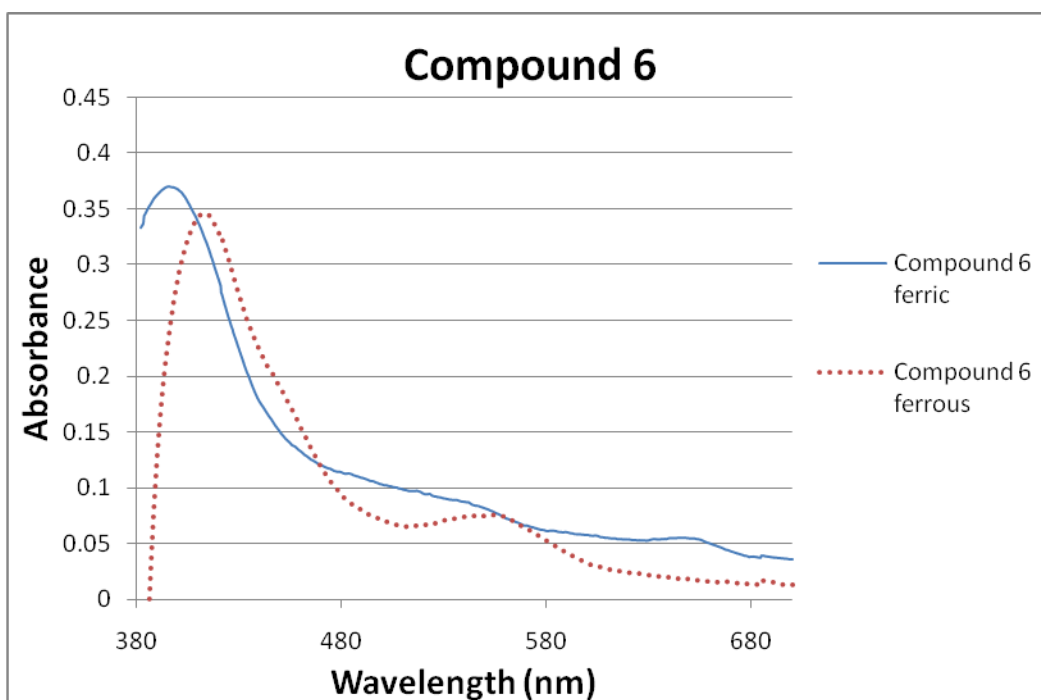

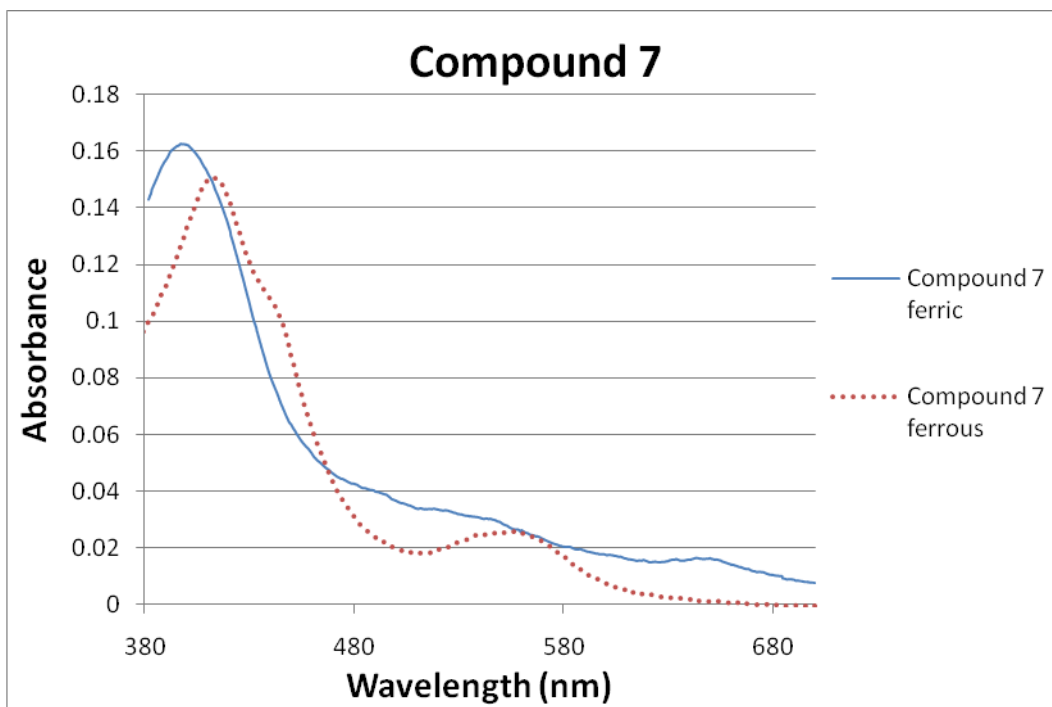

Supplementary Figure S3: Inverse titration for **8**

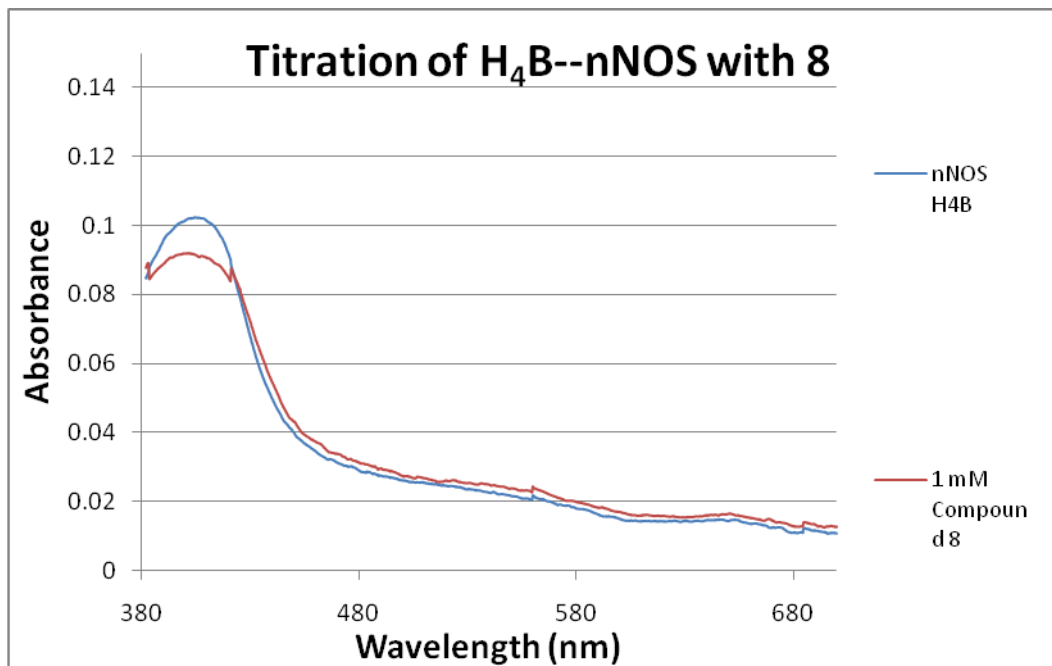

There was a substantial drop in the Soret peak height upon addition of **8**, which was quite different from what was observed with the other type I ferric ligands, for which the Soret peak increased in intensity and was blue-shifted.

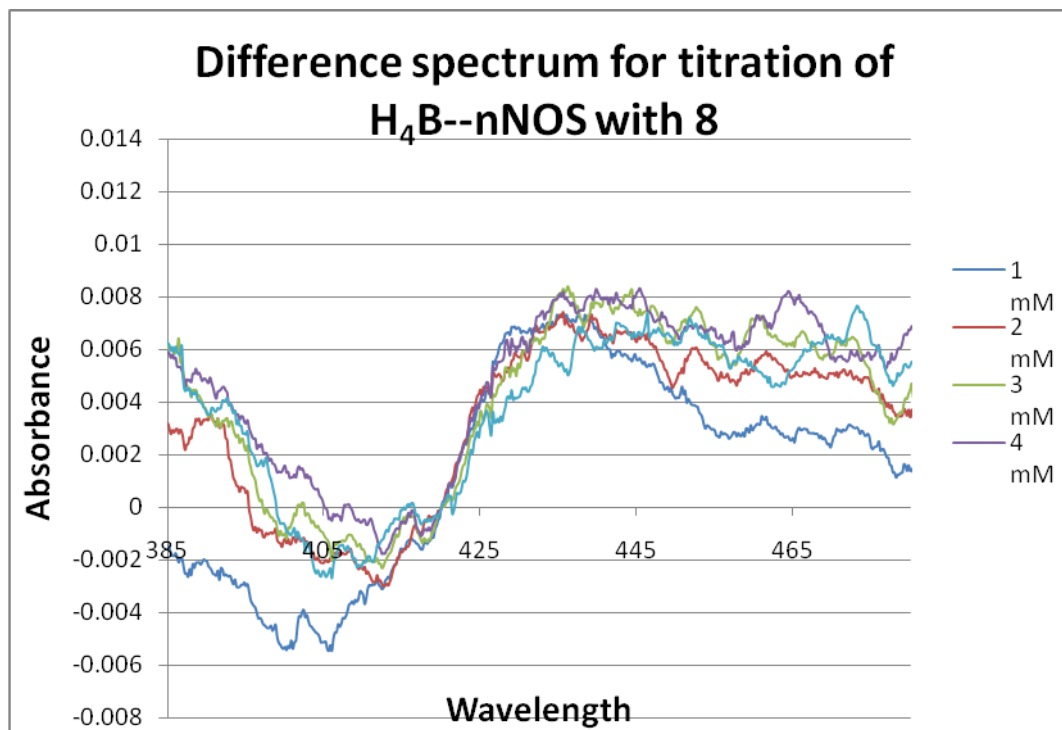

Upon titration of H<sub>4</sub>B--nNOS with **8**, the following type II difference spectrum was obtained. Note that spectrum intensity was scaled based on the volume change for this titration, and the absorbance of **8** in the near UV region was subtracted out.

Supplementary Figure S4: Active site structures of nNOS heme domain with **5** (panel A) and **8** (B) bound.

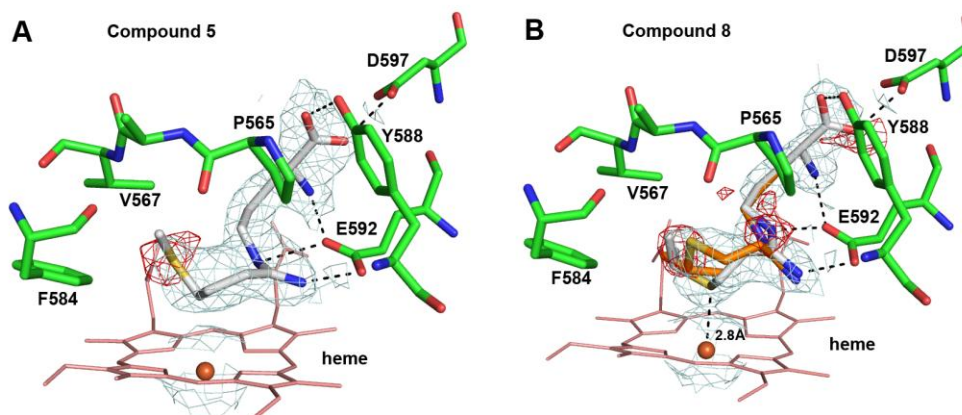

The density maps of 2Fo-Fc (pale cyan) at 1  $\sigma$  contour level and Fo-Fc (red) at -3.0  $\sigma$  for the bound inhibitor and for the heme iron atom are shown. Hydrogen bonds and the Fe-S distance are depicted with dashed lines. The inhibitor models shown were built according to partially observed densities. For **5**, the density is missing for the sulfur atom and its methyl tail, thus their locations are uncertain. One conformation of **5** is shown but an alternate tail position is possible. The closest Fe-S distance in the current model is 4.5 Å. For **8**, the density is visible only up to where the sulfur atom is because of a clear Fe-S interaction. However, the isopropyl tail was built in so long as it makes tolerable van der Waals contacts with protein. Two alternate conformations were modeled with one of them in a type I (sulfur swings away) mode. The shortest Fe-S distance is 2.8 Å.

Supplementary Figure S5: Active site structures of nNOS heme domain with **4** (panel A) and **5** (B) bound derived from data collected with dithionite reduced crystals.

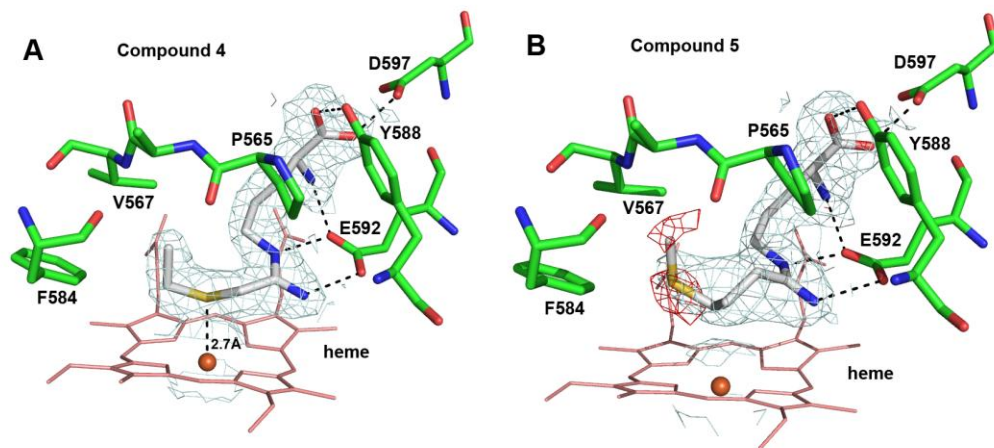

The density maps of  $2F_o-F_c$  (pale cyan) at  $1\sigma$  contour level and  $F_o-F_c$  (red) at  $-3.0\sigma$  for the bound inhibitor and the heme iron atom are shown. Hydrogen bonds and the Fe-S distance are depicted with dashed lines. For **4** hardly any difference can be found in its binding mode compared to the nNOS – **4** structure using an untreated crystal except that the Fe-S distance is slightly shorter at 2.7 Å. The density for **5** looks almost identical in structures with or without dithionite reduction; the thioether tail is disordered beyond the sulfur atom. Data were collected to 2.4 Å resolution with a reduced nNOS crystal for compound **3** as well, but the data quality was poor; thus, the refinement was not completed. From the available density it seems that the alternate type I conformation has been eliminated. The type II binding mode gives a Fe-S distance of about 2.7 Å, essentially no different from that in the untreated structure.



## Experimental Section

### CHEMICAL SYNTHESIS

#### Materials and analytical methods.

All reagents and solvents were purchased from Sigma-Aldrich Chemical Co. (Milwaukee, WI) or Novabiochem (Gibbstown, NJ) and were used without further purification.  $^1\text{H}$  NMR spectra were recorded in  $\text{CDCl}_3$  or  $\text{D}_2\text{O}$  on a Varian Mercury 400 MHz, Varian Inova 500 MHz, or P Inova 500 MHz spectrometer (100.6 MHz for  $^{13}\text{C}$  NMR on the Mercury 400, and 125.7 MHz for  $^{13}\text{C}$  NMR on the Inova 500 and P Inova 500). All ion exchange chromatography was performed using Dowex 50WX8-200 resin. Chemical shifts are reported as  $\delta$  values in parts per million with the  $\text{CDCl}_3$  and  $\text{D}_2\text{O}$  peaks set at 7.26 and 4.80 ppm, respectively. An Orion research model 701H pH meter with a general combination electrode was used for pH measurements. High-resolution mass spectra were carried out using an Agilent (Wilmington, DE) 6210 ToF-LC/MS mass spectrometer; analyses were performed in the positive ion ESI mode using the reflectron configuration.

## Synthetic Scheme

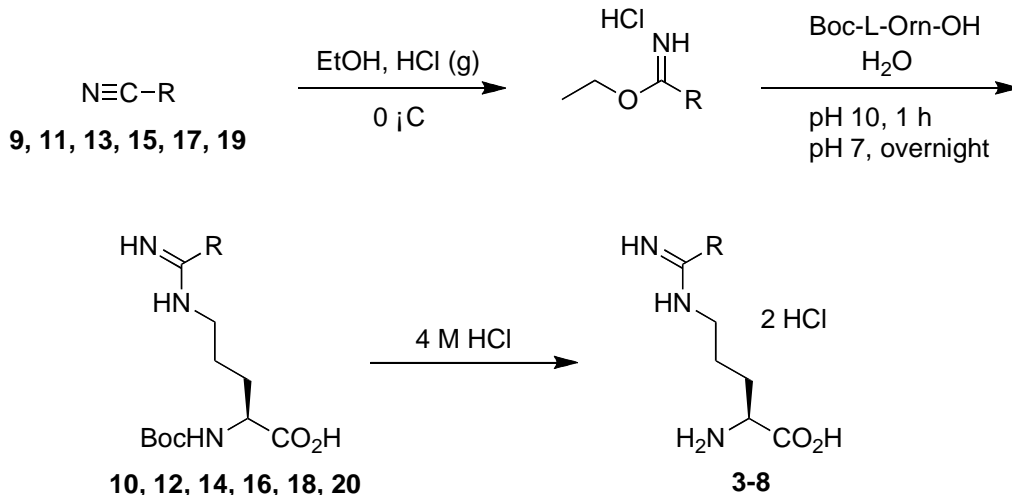

|                                                                     |                                                                     |                                                                    |
|---------------------------------------------------------------------|---------------------------------------------------------------------|--------------------------------------------------------------------|
| <b>9:</b> R = $-(\text{CH}_2)_2\text{SCH}_2\text{CH}_3$             | <b>10:</b> R = $-(\text{CH}_2)_2\text{SCH}_2\text{CH}_3$            | <b>3:</b> R = $-(\text{CH}_2)_2\text{SCH}_2\text{CH}_3$            |
| <b>11:</b> R = $-\text{CH}_2\text{SCH}_2\text{CH}_3$                | <b>12:</b> R = $-\text{CH}_2\text{SCH}_2\text{CH}_3$                | <b>4:</b> R = $-\text{CH}_2\text{SCH}_2\text{CH}_3$                |
| <b>13:</b> R = $-(\text{CH}_2)_3\text{SCH}_3$                       | <b>14:</b> R = $-(\text{CH}_2)_3\text{SCH}_3$                       | <b>5:</b> R = $-(\text{CH}_2)_3\text{SCH}_3$                       |
| <b>15:</b> R = $-\text{CH}_2\text{S}(\text{CH}_2)_2\text{CH}_3$     | <b>16:</b> R = $-\text{CH}_2\text{S}(\text{CH}_2)_2\text{CH}_3$     | <b>6:</b> R = $-\text{CH}_2\text{S}(\text{CH}_2)_2\text{CH}_3$     |
| <b>17:</b> R = $-(\text{CH}_2)_2\text{S}(\text{CH}_2)_2\text{CH}_3$ | <b>18:</b> R = $-(\text{CH}_2)_2\text{S}(\text{CH}_2)_2\text{CH}_3$ | <b>7:</b> R = $-(\text{CH}_2)_2\text{S}(\text{CH}_2)_2\text{CH}_3$ |
| <b>19:</b> R = $-(\text{CH}_2)_2\text{SCH}(\text{CH}_3)_2$          | <b>20:</b> R = $-(\text{CH}_2)_2\text{SCH}(\text{CH}_3)_2$          | <b>8:</b> R = $-(\text{CH}_2)_2\text{SCH}(\text{CH}_3)_2$          |

### 3-Ethylmercaptopropionitrile (9)

Ethaneithiol (2.52 g, 41 mmol) and catalytic NaOMe (0.20 g, 3.7 mmol) were added to a 100-mL round-bottomed flask, and the solution was cooled to 0 °C. Acrylonitrile (4.72 g, 81 mmol) was added dropwise over a period of approximately 10 min, during which time the temperature of the reaction was not allowed to exceed 10 °C. The reaction was allowed to come to room temperature over the course of 10 h with stirring. The solution was concentrated using rotary evaporation, then placed on an oil pump overnight to yield **9** (4.58 g, 97%) as an orange liquid. <sup>1</sup>H-NMR (500 MHz, CDCl<sub>3</sub>) δ 2.80 (t, *J* = 7.0 Hz, 2H), 2.66-2.63 (m, 4H), 1.29 (t, *J* = 7.5 Hz, 3H).

***N*<sup>1</sup>-Boc-*N*<sup>5</sup>-(1-Imino-3-(ethylthio)propyl)-L-ornithine (**10**)**

A 250-mL three-necked flask was charged with **9** (10.32 g, 90 mmol) and anhydrous, reagent grade ethanol (50.0 mL, 911 mmol). The solution was cooled to 0 °C and allowed to stir for approximately 10 min. HCl gas was then bubbled through the reaction solution for 1 h. The reaction solution was allowed to warm to room temperature overnight with stirring. Nitrogen was blown over the solution for several hours to remove excess solvent, and the remaining white solid was dried on an oil pump to yield ethyl imidic ester **10** (12.92 g, 89%), which was used in the next step without further purification. <sup>1</sup>H-NMR (500 MHz, CDCl<sub>3</sub>) δ 12.50 (br s, 1H), 11.66 (br s, 1H), 4.67 (q, *J* = 7.0 Hz, 2H), 3.07 (t, *J* = 7.0 Hz, 2H), 2.90 (t, *J* = 7.0 Hz, 2H), 2.65 (q, *J* = 7.0 Hz, 2H), 1.50 (t, *J* = 7.0 Hz, 3H), 1.27 (t, *J* = 7.5 Hz, 3H).

*N*<sup>α</sup>-Boc-L-Orn-OH<sup>23</sup> (0.72 g, 3.1 mmol) and deionized water (5 mL) were added to a 20 mL vial. The mixture was stirred at room temperature until all of the *N*<sup>α</sup>-Boc-L-Orn-OH was dissolved. NaOH (2.5 M) was added to the solution until the pH was above 10.0. A solution of the ethyl imidic ester (1.54 g, 7.8 mmol) in 2 mL of anhydrous ethanol was added dropwise to the *N*<sup>α</sup>-Boc-L-Orn-OH solution. Additional NaOH (2.5 M) was added as needed to keep the pH of the reaction solution above 10.0. When the dropwise addition of the ethyl imidic ester solution was complete, the solution was stirred for 1 h at pH 10.5, neutralized using 1 M HCl, and left to stir overnight. The solvent was removed by rotary evaporation, and the crude material was dissolved in 30 mL of deionized water and washed with ethyl acetate (3 x 30 mL). One-eighth of the crude material was purified further using cation exchange chromatography with 5% aqueous pyridine elution to yield **10** (0.090 g, 76%) as a hygroscopic white solid. <sup>1</sup>H-NMR (500 MHz, CDCl<sub>3</sub>) δ 3.89 (m, 1 H), 3.30 (t, *J* = 5.5 Hz, 2 H), 2.89 (t, *J* = 7.0 Hz, 2 H), 2.76 (t, *J* = 7.0 Hz, 2 H), 2.60

(q,  $J = 7.5$  Hz, 2 H), 1.90-1.64 (m, 4 H), 1.40 (s, 9 H), 1.23 (t,  $J = 7.0$  Hz, 3 H).  $^{13}\text{C}$ -NMR (125.7 MHz,  $\text{D}_2\text{O}$ ):  $\delta$  179.3, 165.9, 157.5, 81.0, 55.4, 41.6, 32.7, 29.2, 27.6, 27.4, 25.2, 23.3, 13.7. HRMS (ESI,  $\text{H}_2\text{O}$ ) ( $m/z$ ):  $\text{M}+\text{H}^+$  calcd for  $\text{C}_{15}\text{H}_{30}\text{N}_3\text{O}_4\text{S}$  348.1952, found 348.1965.

### ***N*<sup>5</sup>-(1-Imino-3-(ethylthio)propyl)-L-ornithine (3)**

Compound **10** (0.052 g, 0.14 mmol) was dissolved in 4 M HCl (3 mL) and left to stir overnight. The acidic solution was concentrated using rotary evaporation, and residual water was removed using a lyophilizer to provide **3** (0.035 g, quantitative yield) as a hygroscopic yellow solid.  $^1\text{H}$ -NMR (400 MHz,  $\text{D}_2\text{O}$ )  $\delta$  4.13 (t,  $J = 6.4$  Hz, 1 H), 3.40 (t,  $J = 6.8$  Hz, 2 H), 2.94 (t,  $J = 7.2$  Hz, 2 H), 2.81 (t,  $J = 6.8$  Hz, 2 H), 2.63 (q,  $J = 7.2$  Hz, 2 H), 2.15-2.01 (m, 2 H), 1.93-1.77 (m, 2H), 1.25 (t,  $J = 7.2$  Hz, 3 H).  $^{13}\text{C}$ -NMR (100 MHz,  $\text{D}_2\text{O}$ ):  $\delta$  171.7, 166.2, 52.5, 41.3, 32.7, 27.4, 27.0, 25.1, 22.6, 13.7. HRMS (ESI,  $\text{H}_2\text{O}$ ) ( $m/z$ ):  $\text{M}+\text{H}^+$  calcd for  $\text{C}_{10}\text{H}_{22}\text{N}_3\text{O}_2\text{S}$  248.1427, found 248.1439.

### **2-(Ethylthio)acetonitrile (11)**

Ethanethiol (2.75 mL, 37.1 mmol), NaOMe (2.00g, 37.1 mmol), and methanol (80 mL, 2.18 mol) were added to a 500-mL round-bottomed flask. Bromoacetonitrile (2.07 mL, 29.7 mmol) was then added dropwise over a period of approximately 5 min. The reaction mixture was left to stir for 24 h. The methanol was removed by rotary evaporation, and the resulting material was dissolved in  $\text{CHCl}_3$ , washed with water (4 x 50 mL), and dried over sodium sulfate. The  $\text{CHCl}_3$  was removed by rotary evaporation to yield **11** (1.61, 54%) as a colorless oil.  $^1\text{H}$ -NMR (500 MHz,  $\text{CDCl}_3$ )  $\delta$  3.37 (s, 2 H), 2.79 (q,  $J = 7.5$  Hz, 2 H), 1.36 (t,  $J = 7.5$  Hz, 3 H).

### ***N*<sup>1</sup>-Boc-*N*<sup>5</sup>-(1-Imino-3-(ethylthio)ethyl)-L-ornithine (12)**

Compound **11** (1.62 g, 16.0 mmol) was allowed to react with anhydrous ethanol (9.3 mL, 160 mmol) in the presence of HCl (g) according to the procedure for **10** to yield the ethyl imidic ester as a crude, light-orange solid that was used in the next reaction without purification. <sup>1</sup>H-NMR (500 MHz, CDCl<sub>3</sub>) δ 12.41 (br s, 1 H), 11.70 (br s, 1 H), 4.69 (q, *J* = 7.0 Hz, 2 H), 3.64 (s, 2 H), 2.76 (q, *J* = 7.0 Hz, 2 H), 1.52 (t, *J* = 7.0 Hz, 3 H), 1.31 (t, *J* = 7.5 Hz, 3 H).

*N*<sup>α</sup>-Boc-L-Orn-OH (0.400 g, 1.7 mmol) was allowed to react with the ethyl imidic ester (0.73 g, 4.3 mmol) and purified according to the procedure for **10** to yield **12** (0.11 g, 55%) as a hygroscopic light orange solid. <sup>1</sup>H-NMR (500 MHz, D<sub>2</sub>O): δ 3.89-3.79 (m, 1 H), 3.52 (m, 1 H),<sup>2</sup> 3.31 (t, *J* = 5.5 Hz, 2 H), 2.58 (q, *J* = 7.5 Hz, 2 H), 1.79-1.62 (m, 4 H), 1.39 (s, 9 H), 1.20 (t, *J* = 7.5 Hz, 3 H). <sup>13</sup>C-NMR (125.7 MHz, D<sub>2</sub>O): δ 179.1, 165.3, 157.4, 80.9, 55.3, 41.9, 31.8, 29.2, 27.6, 26.0, 23.3, 13.5. HRMS (ESI, H<sub>2</sub>O) (*m/z*): M+H<sup>+</sup> calcd for C<sub>14</sub>H<sub>28</sub>N<sub>3</sub>O<sub>4</sub>S 334.1795, found 334.1807.

### ***N*<sup>5</sup>-(1-Imino-3-(ethylthio)ethyl)-L-ornithine (4)**

Compound **12** (0.15 g, 0.42 mmol) was deprotected according to the procedure for **3** to yield **4** (0.098 g, quantitative yield) as a yellow hygroscopic solid. <sup>1</sup>H-NMR (500 MHz, D<sub>2</sub>O): δ 4.11 (t, *J* = 6.5 Hz, 1 H), 3.56-3.55 (m, 1.4 H),<sup>2</sup> 3.37 (t, *J* = 7.0 Hz, 2 H), 2.58 (q, *J* = 7.5 Hz, 2 H), 2.03-1.98 (m, 2 H), 1.88-1.82 (m, 1 H), 1.80-1.73 (m, 1 H), 1.19 (t, *J* = 7.5 Hz, 3 H). <sup>13</sup>C-NMR (125.7 MHz, D<sub>2</sub>O): δ 171.4, 165.6, 52.2, 41.6, 31.9, 26.9, 26.1, 22.6, 13.6. HRMS (ESI, H<sub>2</sub>O) (*m/z*): M+H<sup>+</sup> calcd for C<sub>9</sub>H<sub>20</sub>N<sub>3</sub>O<sub>2</sub>S 234.1276, found 234.1282.

#### **4-(Methylthio)butanenitrile (13)**

To a 250 mL roundbottom flask were added MeOH (100 mL, 2.72 mol) and NaSMe (1.91 g, 27.2 mmol). The mixture was stirred until a cloudy solution formed. 4-Bromobutyronitrile (2.15 mL, 21.7 mmol) was added dropwise over a period of 10 min, during which time the solution became clear. The solution was left to stir overnight. The solvent was removed by rotary evaporation, and the resulting crude material was dissolved in CHCl<sub>3</sub> (30 mL), washed with H<sub>2</sub>O (3 x 30 mL), and dried over sodium sulfate. The CHCl<sub>3</sub> was removed by rotary evaporation to yield **13** (2.48 g, 99%) as a colorless liquid. <sup>1</sup>H-NMR (500 MHz, CDCl<sub>3</sub>) δ 2.63 (t, *J* = 7.0 Hz, 2H), 2.52 (t, *J* = 7.0 Hz, 2H), 2.11 (s, 3H), and 2.00-1.93 (m, 2H).

#### ***N*<sup>1</sup>-Boc-*N*<sup>5</sup>-(1-Imino-3-(methylthio)butyl)-L-ornithine (14)**

Compound **13** (2.48 g, 21.6 mmol) was allowed to react with anhydrous ethanol (5.1 mL, 88 mmol) in the presence of HCl (g) according to the procedure for **10** to afford the ethyl imidic ester as a white solid (3.78 g, 87%), which was used without further purification. <sup>1</sup>H-NMR (500 MHz, CDCl<sub>3</sub>) δ 11.51 (br s, 1 H), 10.71 (br s, 1 H), 4.60 (q, *J* = 7.0 Hz, 2 H), 2.88 (t, *J* = 8.0 Hz, 2 H), 2.60 (t, *J* = 7.0 Hz, 2 H), 2.11 (s, 3 H), 2.10-2.04 (m, 2 H), 1.52 (t, *J* = 7.0 Hz, 3 H).

*N*<sup>α</sup>-Boc-L-Orn-OH (0.400 g, 1.7 mmol) was allowed to react with the ethyl imidic ester (0.85 g, 4.3 mmol) and purified according to the procedure for **10** to yield **14** (0.15 g, 74%) as a light orange solid. <sup>1</sup>H-NMR (500 MHz, D<sub>2</sub>O): δ 3.90-3.79 (m, 1 H), 3.27 (t, *J* = 5.5 Hz, 2 H), 2.56 (m, 4 H), 2.08 (s, 3 H), 1.95 (t, *J* = 6.0 Hz, 2 H), 1.81-1.59 (m, 4 H), and 1.37 (s, 9 H). <sup>13</sup>C-NMR (100 MHz, D<sub>2</sub>O): δ 179.0, 167.1, 157.2, 80.8, 55.3, 41.5, 31.8, 31.5, 29.2, 27.6, 25.6, 23.2, and 13.9. HRMS (ESI, H<sub>2</sub>O) (*m/z*): M+H<sup>+</sup> calcd for C<sub>15</sub>H<sub>30</sub>N<sub>3</sub>O<sub>4</sub>S 348.1952, found 348.1966.

### ***N*<sup>5</sup>-(1-Imino-3-(methylthio)butyl)-L-ornithine (5)**

Compound **14** (0.15 g, 0.41 mmol) was deprotected according to the procedure for **3** to yield **5** (0.10 g, quantitative yield) as a yellow hygroscopic solid. <sup>1</sup>H-NMR (500 MHz, D<sub>2</sub>O) δ 4.04 (t, *J* = 6.5 Hz, 1 H), 3.24 (t, *J* = 7.0 Hz, 2 H), 2.50-2.45 (m, 4 H), 1.98 (s, 3 H), 1.95-1.83 (m, 4 H), 1.76-1.72 (m, 1 H), 1.68-1.63 (m, 1 H). <sup>13</sup>C-NMR (125.7 MHz, D<sub>2</sub>O): δ 171.3, 167.5, 52.2, 41.2, 31.8, 31.6, 26.9, 25.7, 22.6, 14.0. HRMS (ESI, H<sub>2</sub>O) (*m/z*): M+H<sup>+</sup> calcd for C<sub>10</sub>H<sub>22</sub>N<sub>3</sub>O<sub>2</sub>S 248.1427, found 248.1437.

### **2-(Propylthio)acetonitrile (15).**

1-Propanethiol (4.52 g, 59.4 mmol) was allowed to react with bromoacetonitrile (4.75 g, 39.6 mmol) in the presence of methanol (200 mL, 5.44 mol) and NaOMe (3.21 g, 59.4 mmol) and purified according to the procedure for **11** to yield **15** (3.23 g, 71%) as a colorless liquid.

<sup>1</sup>H-NMR (500 MHz, CDCl<sub>3</sub>) δ 3.30 (s, 2 H), 2.73 (t, *J* = 7.0 Hz, 2 H), 1.72-1.66 (m, 2 H), and 1.04 (t, *J* = 7.5 Hz, 3 H).

### ***N*<sup>1</sup>-Boc-*N*<sup>5</sup>-(1-Imino-3-(propylthio)ethyl)-L-ornithine (16)**

Compound **15** (3.23 g, 28.1 mmol) was allowed to react with anhydrous, reagent-grade ethanol (10.0 mL, 171 mmol) in the presence of HCl gas according to the procedure for **10**, resulting in a crude mixture of the ethyl imidic ester and ethanol as a thick, white solution, which was used in the next step without purification. <sup>1</sup>H-NMR (400 MHz, CDCl<sub>3</sub>) δ 12.00 (br s, 1 H), 11.32 (br s, 1 H), 4.68 (q, *J* = 6.8 Hz, 2H), 3.66 (s, 2 H), 2.70 (t, *J* = 6.8 Hz, 2H), 1.69-1.62 (m, 2 H), 1.52 (t, *J* = 6.8 Hz, 3 H), 1.01 (t, *J* = 7.2 Hz, 3 H).

*N*<sup>α</sup>-Boc-L-Orn-OH (0.65 g, 2.8 mmol) was allowed to react with the ethyl imidic ester (1.39 g, 7.0 mmol) and purified according to the procedure for **10** to yield **16** (0.14 g, 70%) as a colorless hygroscopic solid. <sup>1</sup>H-NMR (500 MHz, D<sub>2</sub>O) δ 3.91-3.80 (m, 1 H), 3.52 (m, 1.2 H),<sup>2</sup> 3.34 (t, *J* = 5.5 Hz, 2 H), 2.53 (t, *J* = 6.5 Hz, 2 H), 1.81-1.62 (m, 4 H), 1.57 (m, 2 H), 1.41 (s, 9 H), 0.94 (t, *J* = 7.0 Hz, 3 H). <sup>13</sup>C-NMR (125.7 MHz, D<sub>2</sub>O): δ 179.1, 165.4, 157.4, 80.9, 55.3, 42.0, 33.9, 31.9, 29.3, 27.7, 23.3, 21.9, 12.5. HRMS (ESI, H<sub>2</sub>O) (*m/z*): M+H<sup>+</sup> calcd for C<sub>15</sub>H<sub>30</sub>N<sub>3</sub>O<sub>4</sub>S 348.1952, found 348.1966.

### ***N*<sup>5</sup>-(1-Imino-3-(propylthio)ethyl)-L-ornithine (6)**

Compound **16** (0.14 g, 0.38 mmol) was deprotected according to the procedure for **3** to yield **6** (0.94 g, quantitative yield) as a yellow hygroscopic solid. <sup>1</sup>H-NMR (500 MHz, D<sub>2</sub>O) δ 4.09 (t, *J* = 6.5 Hz, 1 H), 3.51 (m, 0.8 H),<sup>2</sup> 3.36 (t, *J* = 7.0 Hz, 2 H), 2.52 (t, *J* = 7.0 Hz, 2 H), 2.04-1.90 (m, 2 H), 1.85-1.78 (m, 1 H), 1.76-1.69 (m, 1 H), 1.54-1.47 (m, 2 H), 0.87 (t, *J* = 7.5 Hz, 2 H). <sup>13</sup>C-NMR (125.7 MHz, D<sub>2</sub>O): δ 171.3, 165.7, 52.2, 41.6, 34.0, 32.1, 26.9, 22.6, 21.9, 12.5. HRMS (ESI, H<sub>2</sub>O) (*m/z*): M+H<sup>+</sup> calcd for C<sub>10</sub>H<sub>22</sub>N<sub>3</sub>O<sub>2</sub>S 248.1427, found 248.1443.

### **3-1-Propylmercaptopropionitrile (17)**

1-Propanethiol (8.68 g, 114 mmol) was allowed to react with acrylonitrile (12.09 g, 228 mmol) in the presence of catalytic NaOMe (0.152 g, 2.8 mmol) according to the procedure for **9** to yield **17** (14.75 g, quantitative yield) as an orange liquid. <sup>1</sup>H-NMR (500 MHz, CDCl<sub>3</sub>) δ 2.79 (t, 7.5, 2H), 2.64 (t, *J* = 7.5 Hz, 2H), 2.58 (t, *J* = 7.5 Hz, 2H), 1.68-1.60 (m, 2H), 1.01 (t, *J* = 7.0 Hz, 3H).



### ***N*<sup>1</sup>-Boc-*N*<sup>5</sup>-(1-Imino-3-(propylthio)propyl)-L-ornithine (18)**

Compound **17** (15.05 g, 116 mmol) was allowed to react with anhydrous, reagent grade ethanol (40.6 mL, 696 mmol) in the presence of HCl gas according to the procedure for **10** to yield the ethyl imidic ester as an orange oil (24.38 g, 99%), which was used in the next step without further purification. <sup>1</sup>H-NMR (500 MHz, CDCl<sub>3</sub>) δ 12.38 (br s, 1H), 11.53 (br s, 1H), 4.64 (q, *J* = 7.0 Hz, 2H), 3.06 (t, *J* = 7.0 Hz, 2H), 2.86 (t, *J* = 7.0 Hz, 2H), 2.56 (q, *J* = 7.5 Hz, 2H), 1.66-1.59 (m, 2H), 1.48 (t, *J* = 7.0 Hz, 3H), 0.97 (t, *J* = 7.5 Hz, 3H).

*N*<sup>α</sup>-Boc-L-Orn-OH (0.34 g, 1.4 mmol) was allowed to react with the ethyl imidic ester (0.76 g, 3.6 mmol) and purified according to the procedure for **10** to yield **18** as a hygroscopic orange solid (0.11 g, 48%). <sup>1</sup>H-NMR (500 MHz, D<sub>2</sub>O) δ 3.93-3.84 (m, 1 H), 3.30 (t, *J* = 5.5 Hz, 2 H), 2.87 (t, *J* = 7.0 Hz, 2 H), 2.75 (t, *J* = 7.0 Hz, 2 H), 2.56 (t, *J* = 7.5 Hz, 2 H), 1.84-1.61 (m, 4 H), 1.60-1.54 (m, 2 H), 1.41 (s, 9 H), 0.94 (t, *J* = 7.5 Hz, 3 H). <sup>13</sup>C-NMR (125.7 MHz, D<sub>2</sub>O): δ 179.2, 165.9, 157.4, 80.9, 55.3, 41.6, 33.2, 32.7, 29.2, 27.8, 27.6, 23.3, 22.1, 12.5. HRMS (ESI, H<sub>2</sub>O) (*m/z*): M+H<sup>+</sup> calcd for C<sub>16</sub>H<sub>32</sub>N<sub>3</sub>O<sub>4</sub>S 362.2108, found 362.2117.

### ***N*<sup>5</sup>-(1-Imino-3-(propylthio)propyl)-L-ornithine (7)**

Compound **18** (0.070 g, 0.18 mmol) was deprotected according to the procedure for **3** to yield **7** (0.47 g, quantitative yield) as an orange hygroscopic solid. <sup>1</sup>H-NMR (500 MHz, D<sub>2</sub>O) δ 4.08 (t, *J* = 6.0 Hz, 1 H), 3.30 (t, *J* = 6.0 Hz, 2 H), 2.82 (t, *J* = 6.5 Hz, 2 H), 2.72 (t, *J* = 6.5 Hz, 2 H), 2.50 (t, *J* = 7.5 Hz, 2 H), 2.06-1.90 (m, 2 H), 1.85-1.68 (m, 2H), 1.54-1.49 (m, 2H), 0.86 (t, *J* = 7.5 Hz, 3H). <sup>13</sup>C-NMR (125.7 MHz, D<sub>2</sub>O): δ 171.3, 166.2, 52.3, 41.3, 33.2, 32.8, 27.8, 27.0, 22.6,

22.1, 12.6. HRMS (ESI, H<sub>2</sub>O) (*m/z*): M+H<sup>+</sup> calcd for C<sub>11</sub>H<sub>24</sub>N<sub>3</sub>O<sub>2</sub>S 262.1584, found 262.1595.

### **3-2-Propylmercaptopropionitrile (19).**

2-Propanethiol (8.68 g, 114 mmol) was allowed to react with acrylonitrile (12.09 g, 228 mmol) in the presence of catalytic NaOMe (0.152 g, 2.8 mmol) according to the procedure for **9** to yield **19** (14.42 g, 98%) as an orange liquid. <sup>1</sup>H-NMR (500 MHz, CDCl<sub>3</sub>) δ 3.07-2.99 (m, 1H), 2.81 (t, *J* = 7.0 Hz, 2H), 2.63 (t, *J* = 7.0 Hz, 2H), 1.29 (d, *J* = 7.0 Hz, 6H).

### **N<sup>1</sup>-Boc-N<sup>5</sup>-(1-Imino-3-(isopropylthio)propyl)-L-ornithine (20)**

Compound **19** (14.42 g, 112 mmol) was allowed to react with anhydrous, reagent grade ethanol (40 mL, 696 mmol) in the presence of HCl gas according to the procedure for **10** to yield the ethyl imidic ester as an orange oil (23.81 g, quantitative yield), which was used in the next step without further purification. <sup>1</sup>H-NMR (500 MHz, CDCl<sub>3</sub>) δ 12.38 (br s, 1H), 11.53 (br s, 1H), 4.67 (q, *J* = 7.5 Hz, 2H), 3.11-3.03 (m, 3H), 2.91 (t, *J* = 7.0 Hz, 2H), 1.51 (t, *J* = 7.0 Hz, 3H), 1.27 (d, *J* = 7.0 Hz, 6H).

N<sup>α</sup>-Boc-L-Orn-OH (0.16 g, 0.7 mmol) was allowed to react with the ethyl imidic ester (0.37g, 1.8 mmol) and purified according to the procedure for **10** to yield **20** (0.065 g, 77%) as a hygroscopic light orange solid. <sup>1</sup>H-NMR (500 MHz, D<sub>2</sub>O) δ 3.91-3.80 (m, 1 H), 3.29 (t, *J* = 5.5 Hz, 2 H), 3.04-2.98 (m, 1 H), 2.90 (t, *J* = 6.5 Hz, 2 H), 2.75 (t, *J* = 6.5 Hz, 2 H), 1.85-1.62 (m, 4 H), 1.41 (s, 9 H), 1.24 (d, *J* = 6.5 Hz, 6 H). <sup>13</sup>C-NMR (125.7 MHz, D<sub>2</sub>O): δ 179.2, 165.9, 157.4, 80.9, 55.4, 41.7, 34.7, 32.9, 29.3, 27.7, 26.4, 23.3, 22.4. HRMS (ESI, H<sub>2</sub>O) (*m/z*): M+H<sup>+</sup> calcd for C<sub>16</sub>H<sub>32</sub>N<sub>3</sub>O<sub>4</sub>S 362.2108, found 362.2119.

***N*<sup>5</sup>-(1-Imino-3-(isopropylthio)propyl)-L-ornithine (8)**

Compound **20** (0.15 g, 0.42 mmol) was deprotected according to the procedure for **3** to yield **8** (0.11 g, quantitative yield) as a hygroscopic orange solid. <sup>1</sup>H-NMR (500 MHz, D<sub>2</sub>O) δ 3.82 (t, *J* = 6.0 Hz, 1 H), 3.04 (t, *J* = 6.0 Hz, 2 H), 2.73-2.67 (m, 1 H), 2.59 (t, *J* = 7.0 Hz, 2 H), 2.46 (t, *J* = 7.0 Hz, 2 H), 1.79-1.63 (m, 2 H), 1.57-1.42 (m, 2H), 0.89 (d, *J* = 6.5 Hz, 6 H). <sup>13</sup>C-NMR (125.7 MHz, D<sub>2</sub>O): δ 171.1, 166.0, 52.1, 41.2, 35.6, 34.3, 32.8, 26.2, 22.3, 22.1. HRMS (ESI, H<sub>2</sub>O) (*m/z*): M+H<sup>+</sup> calcd for C<sub>11</sub>H<sub>24</sub>N<sub>3</sub>O<sub>2</sub>S 262.1584, found 262.1594.

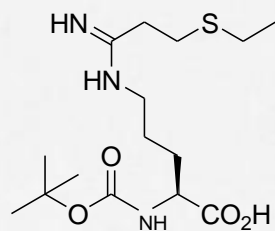

10

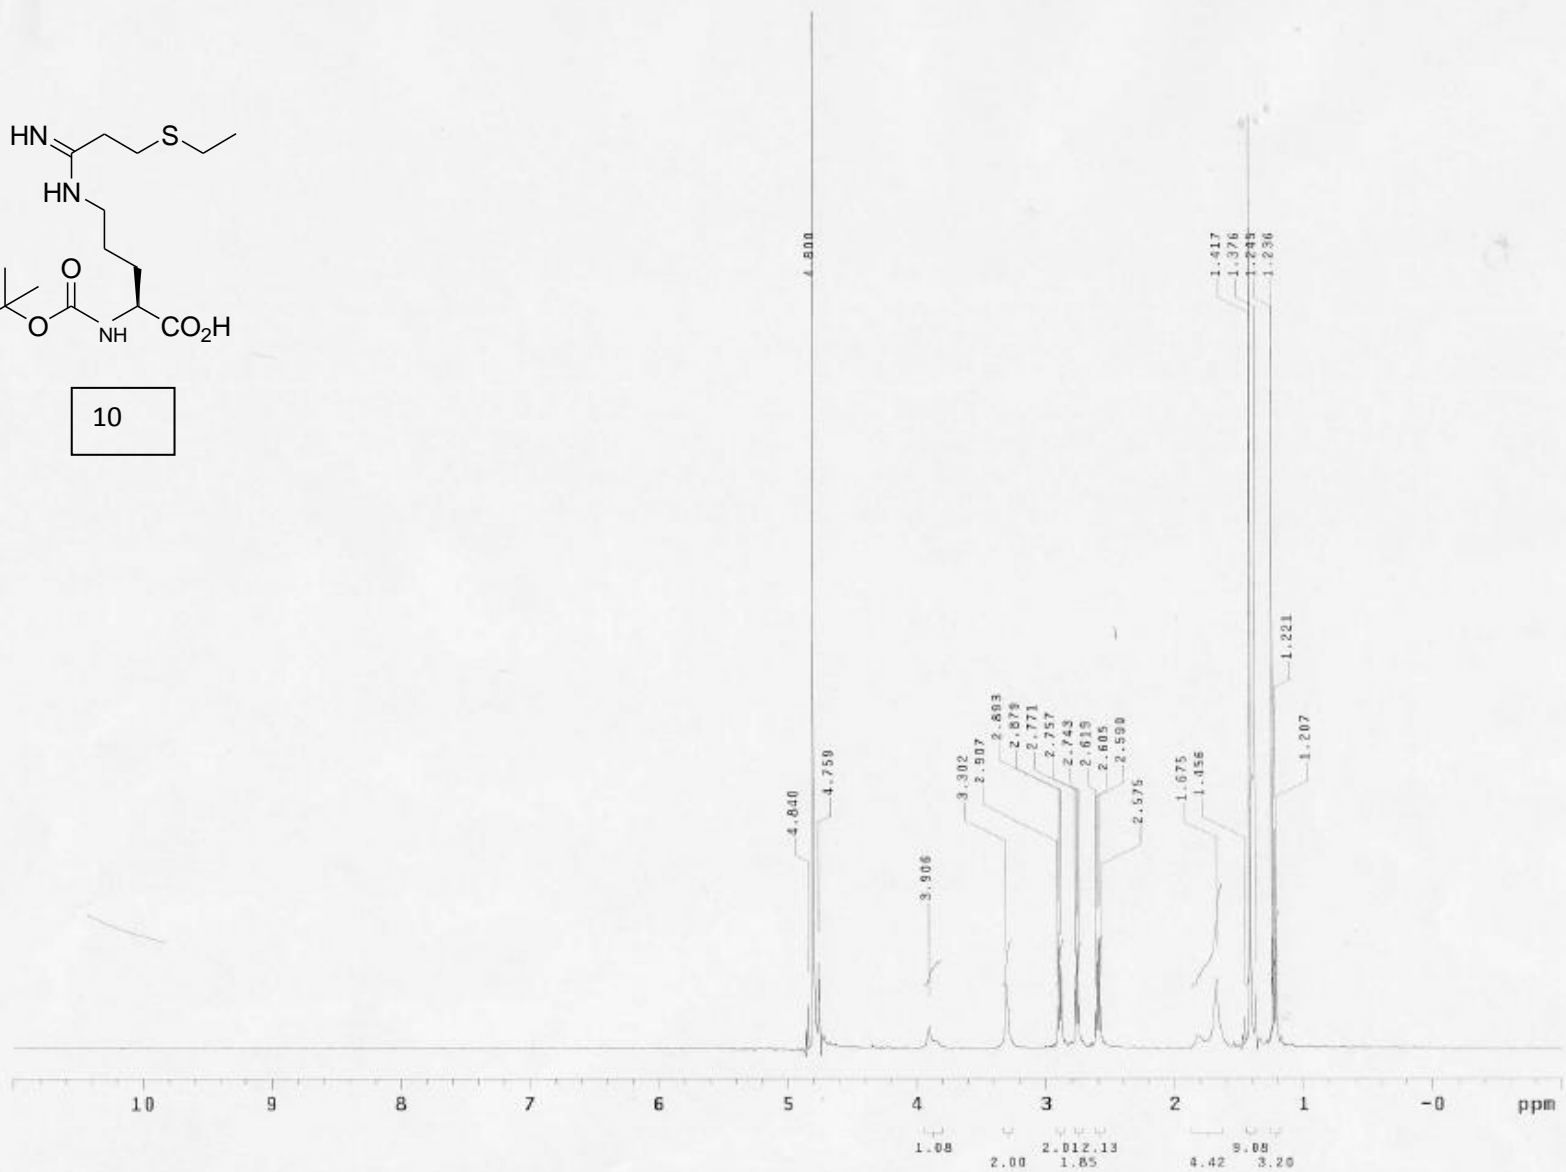

S28

Supplementary Figure S6 continued

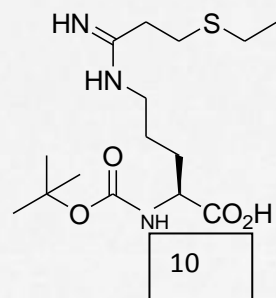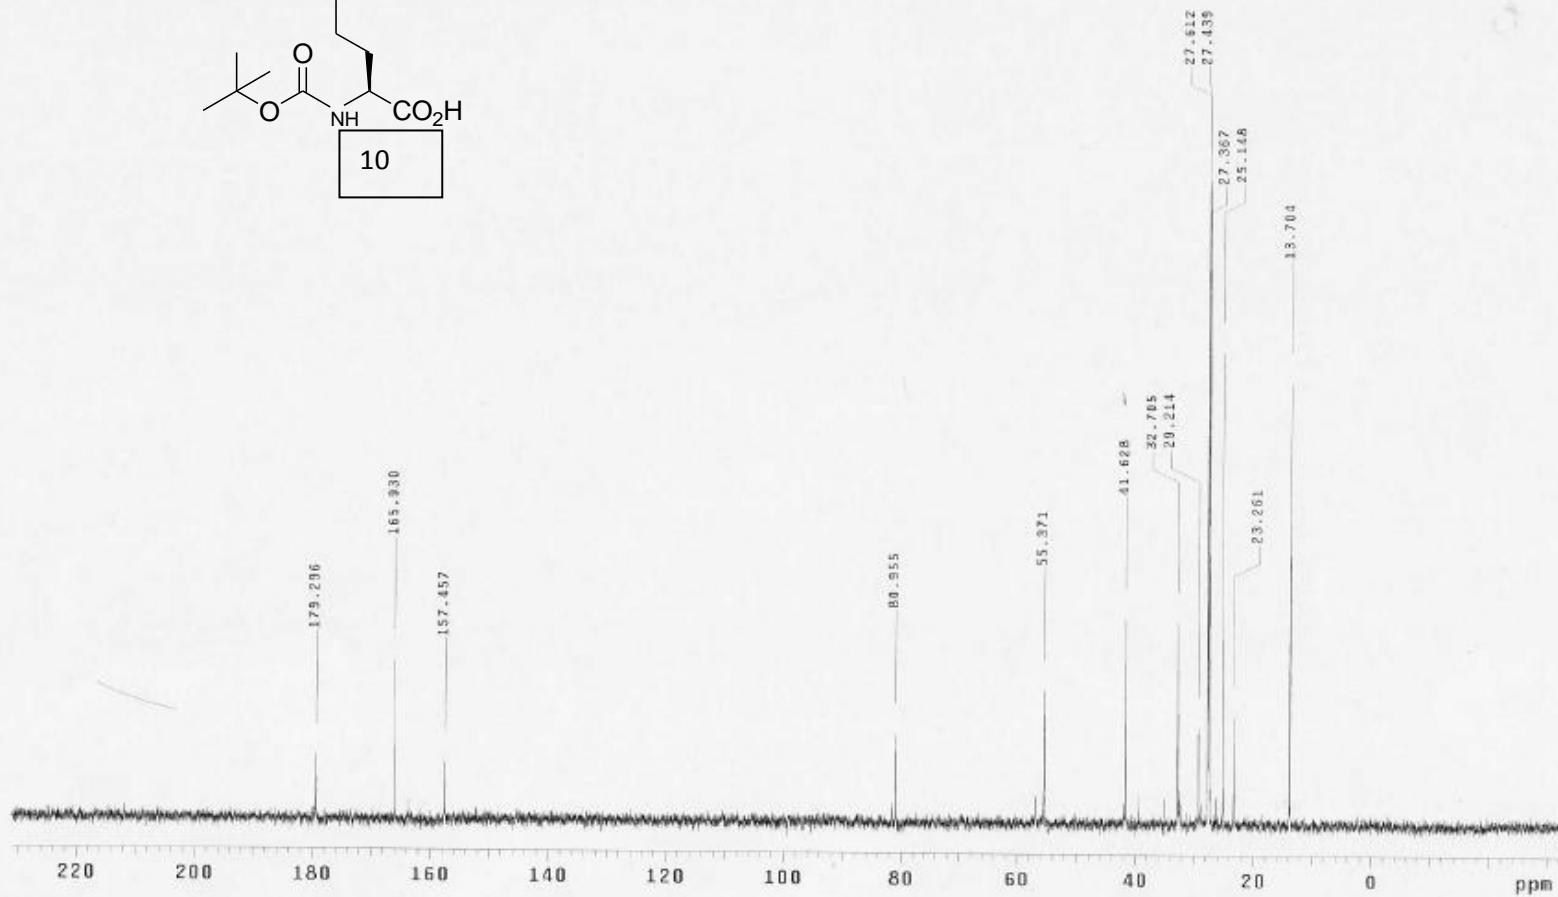

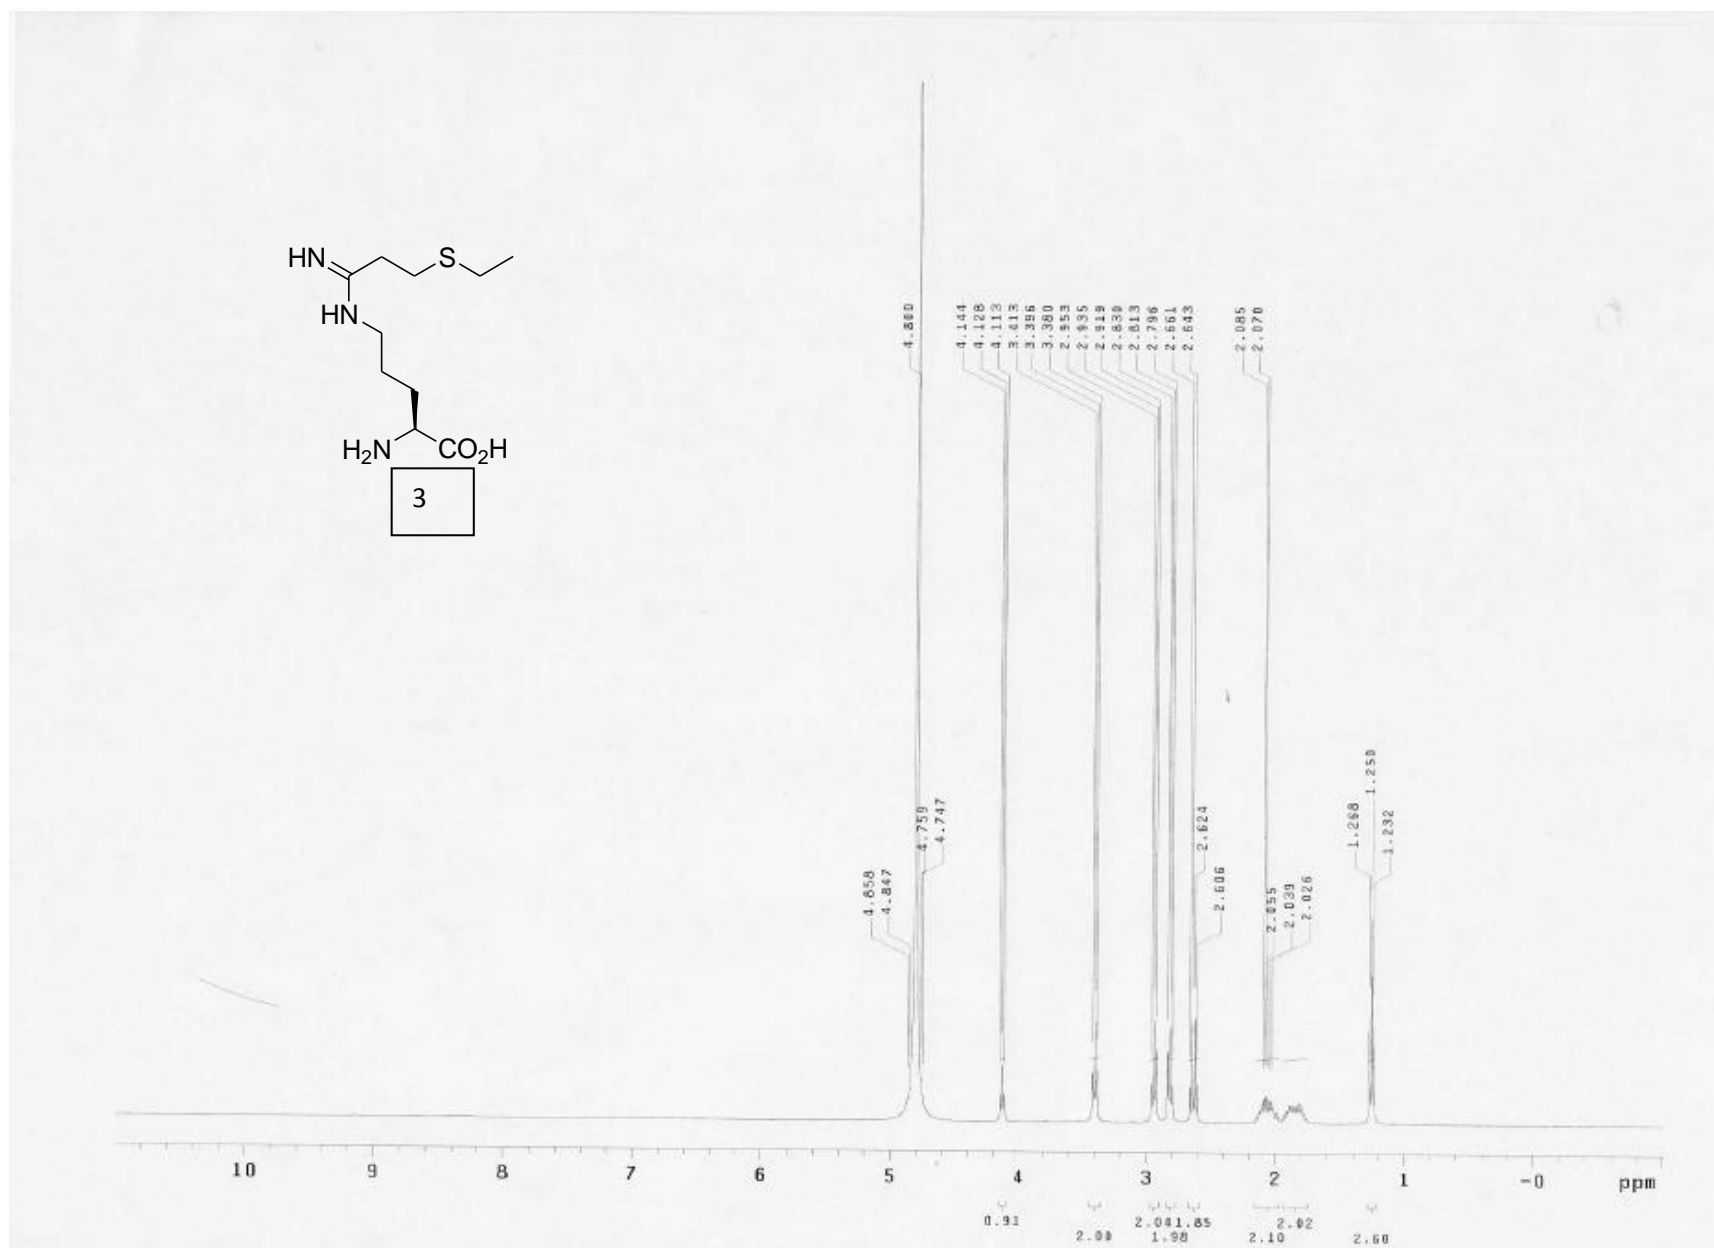

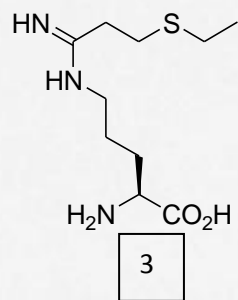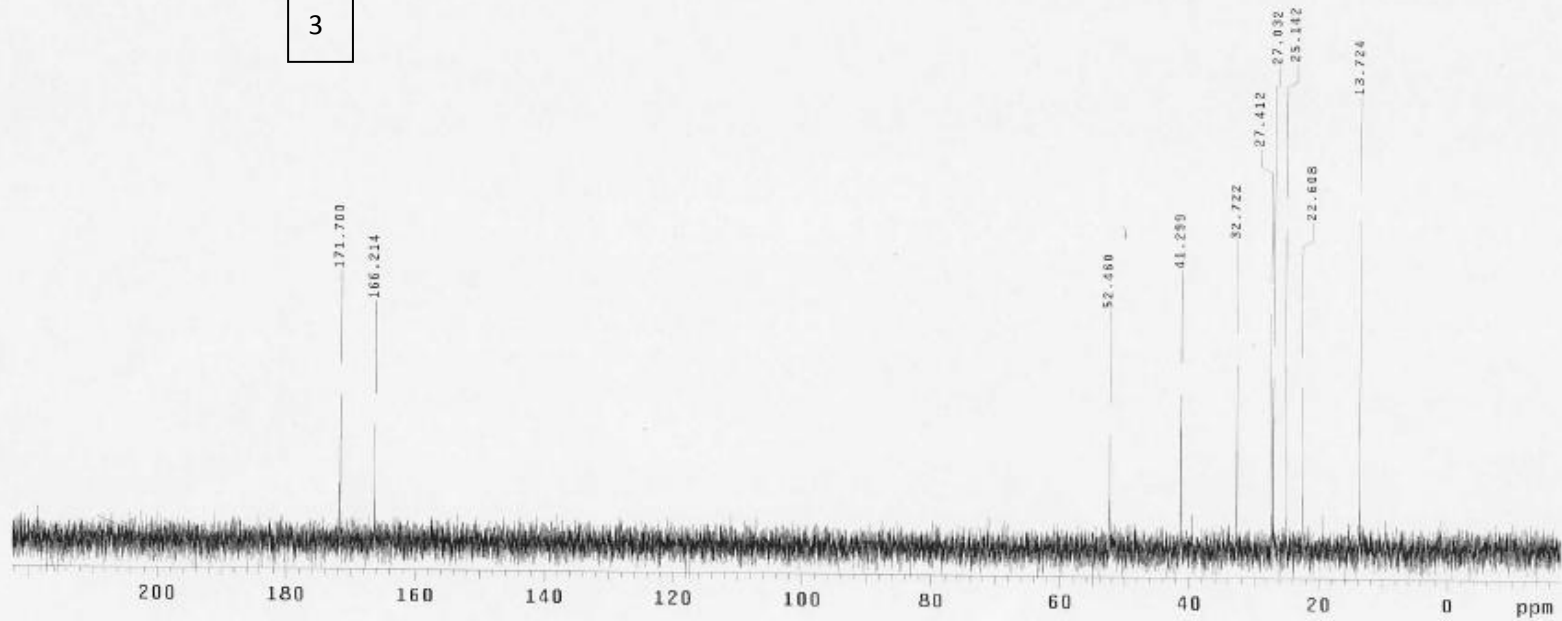

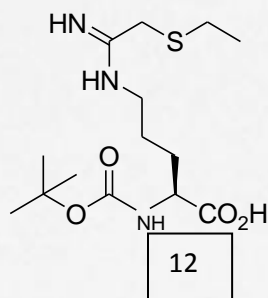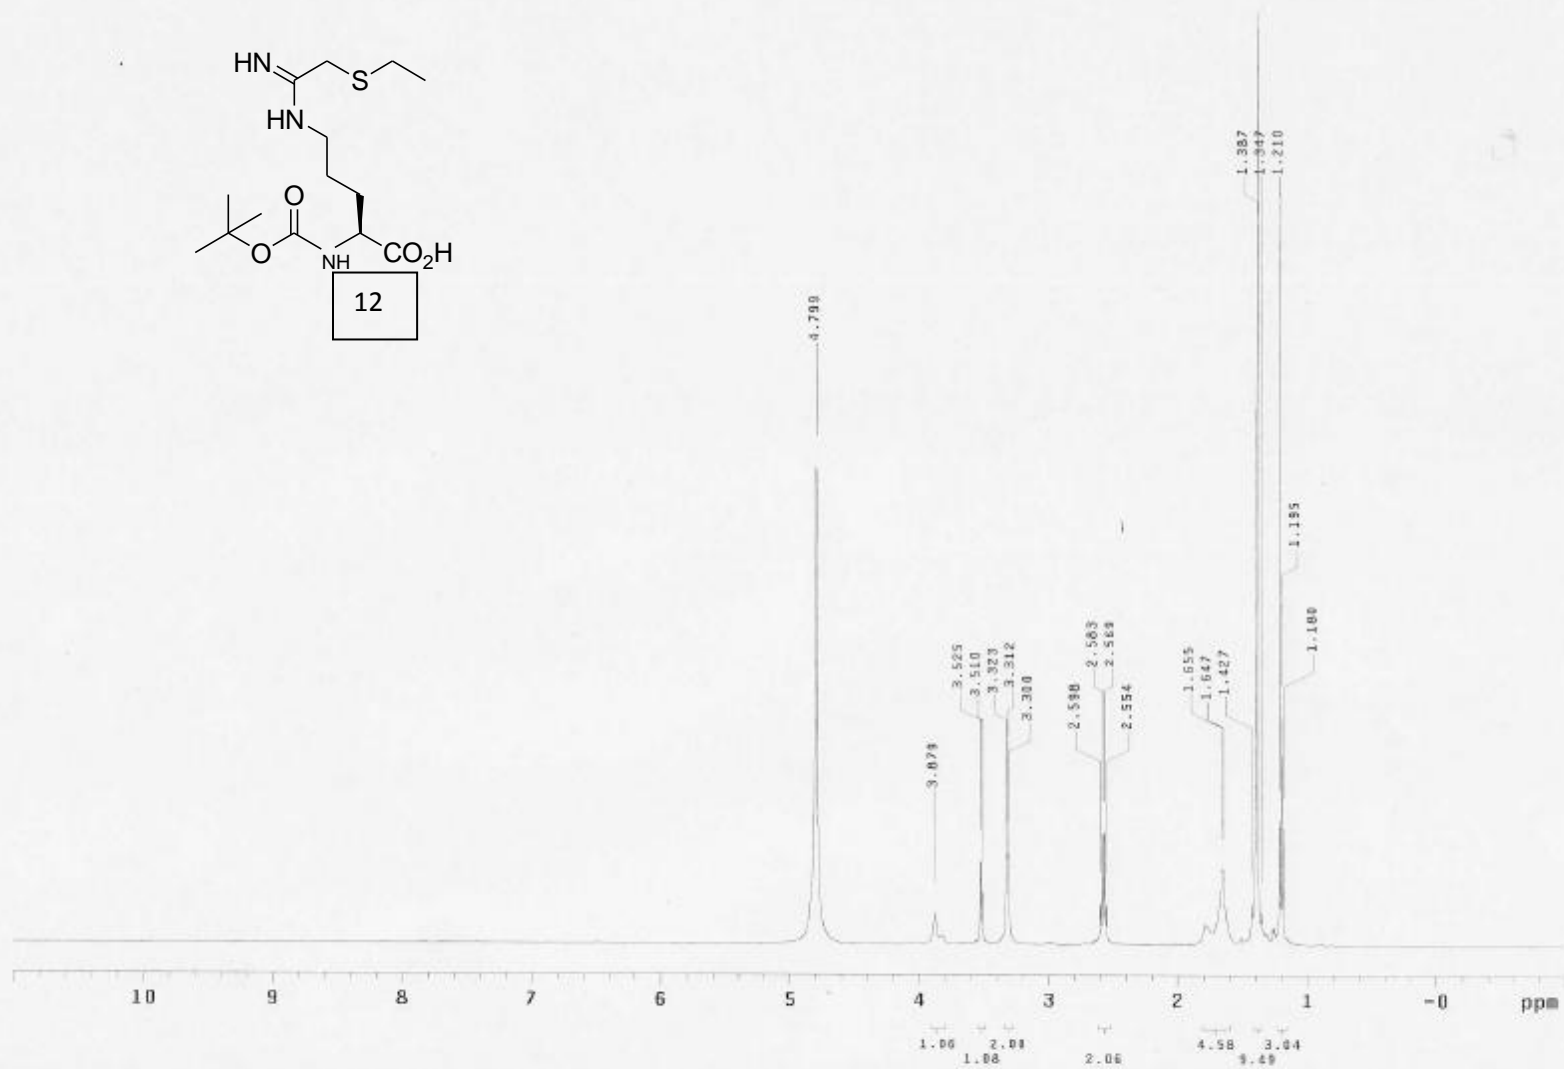



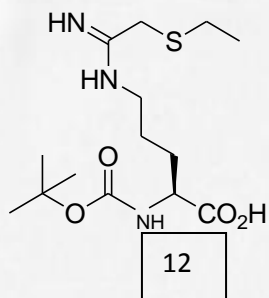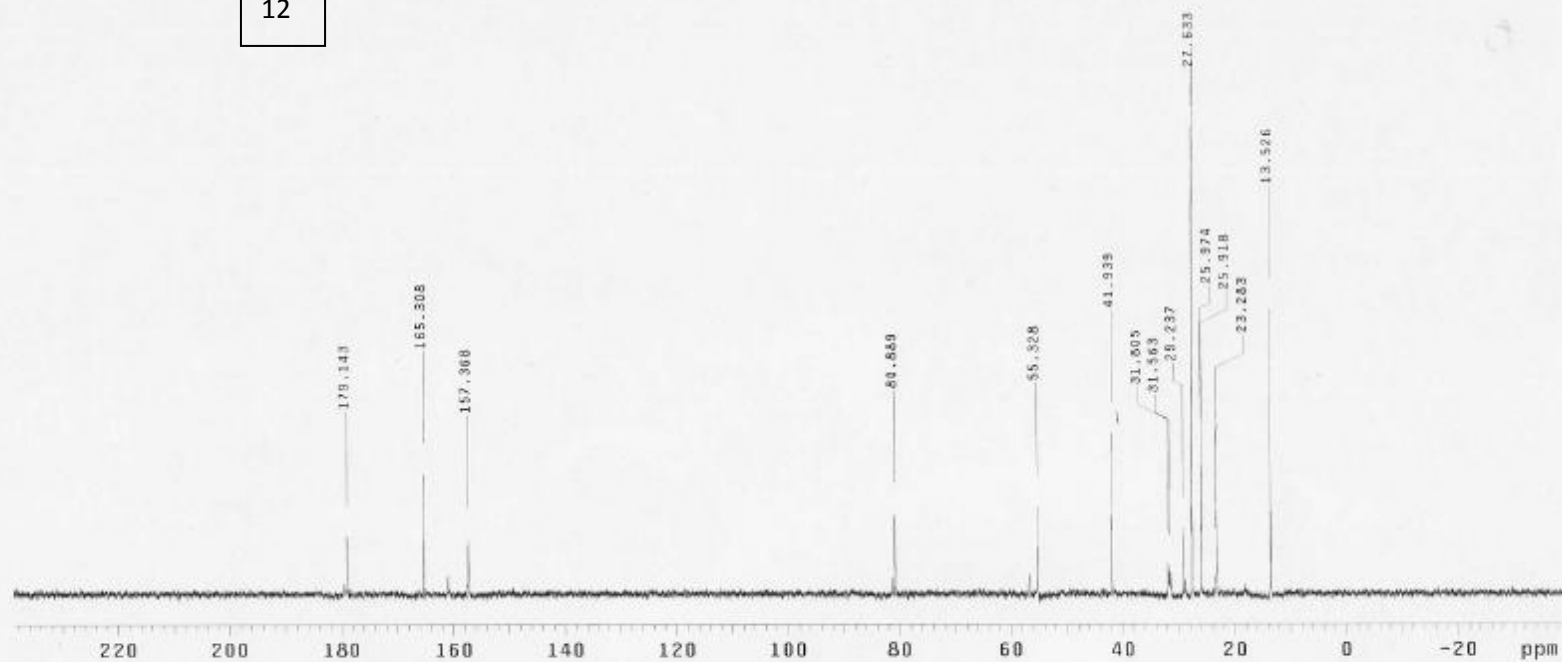

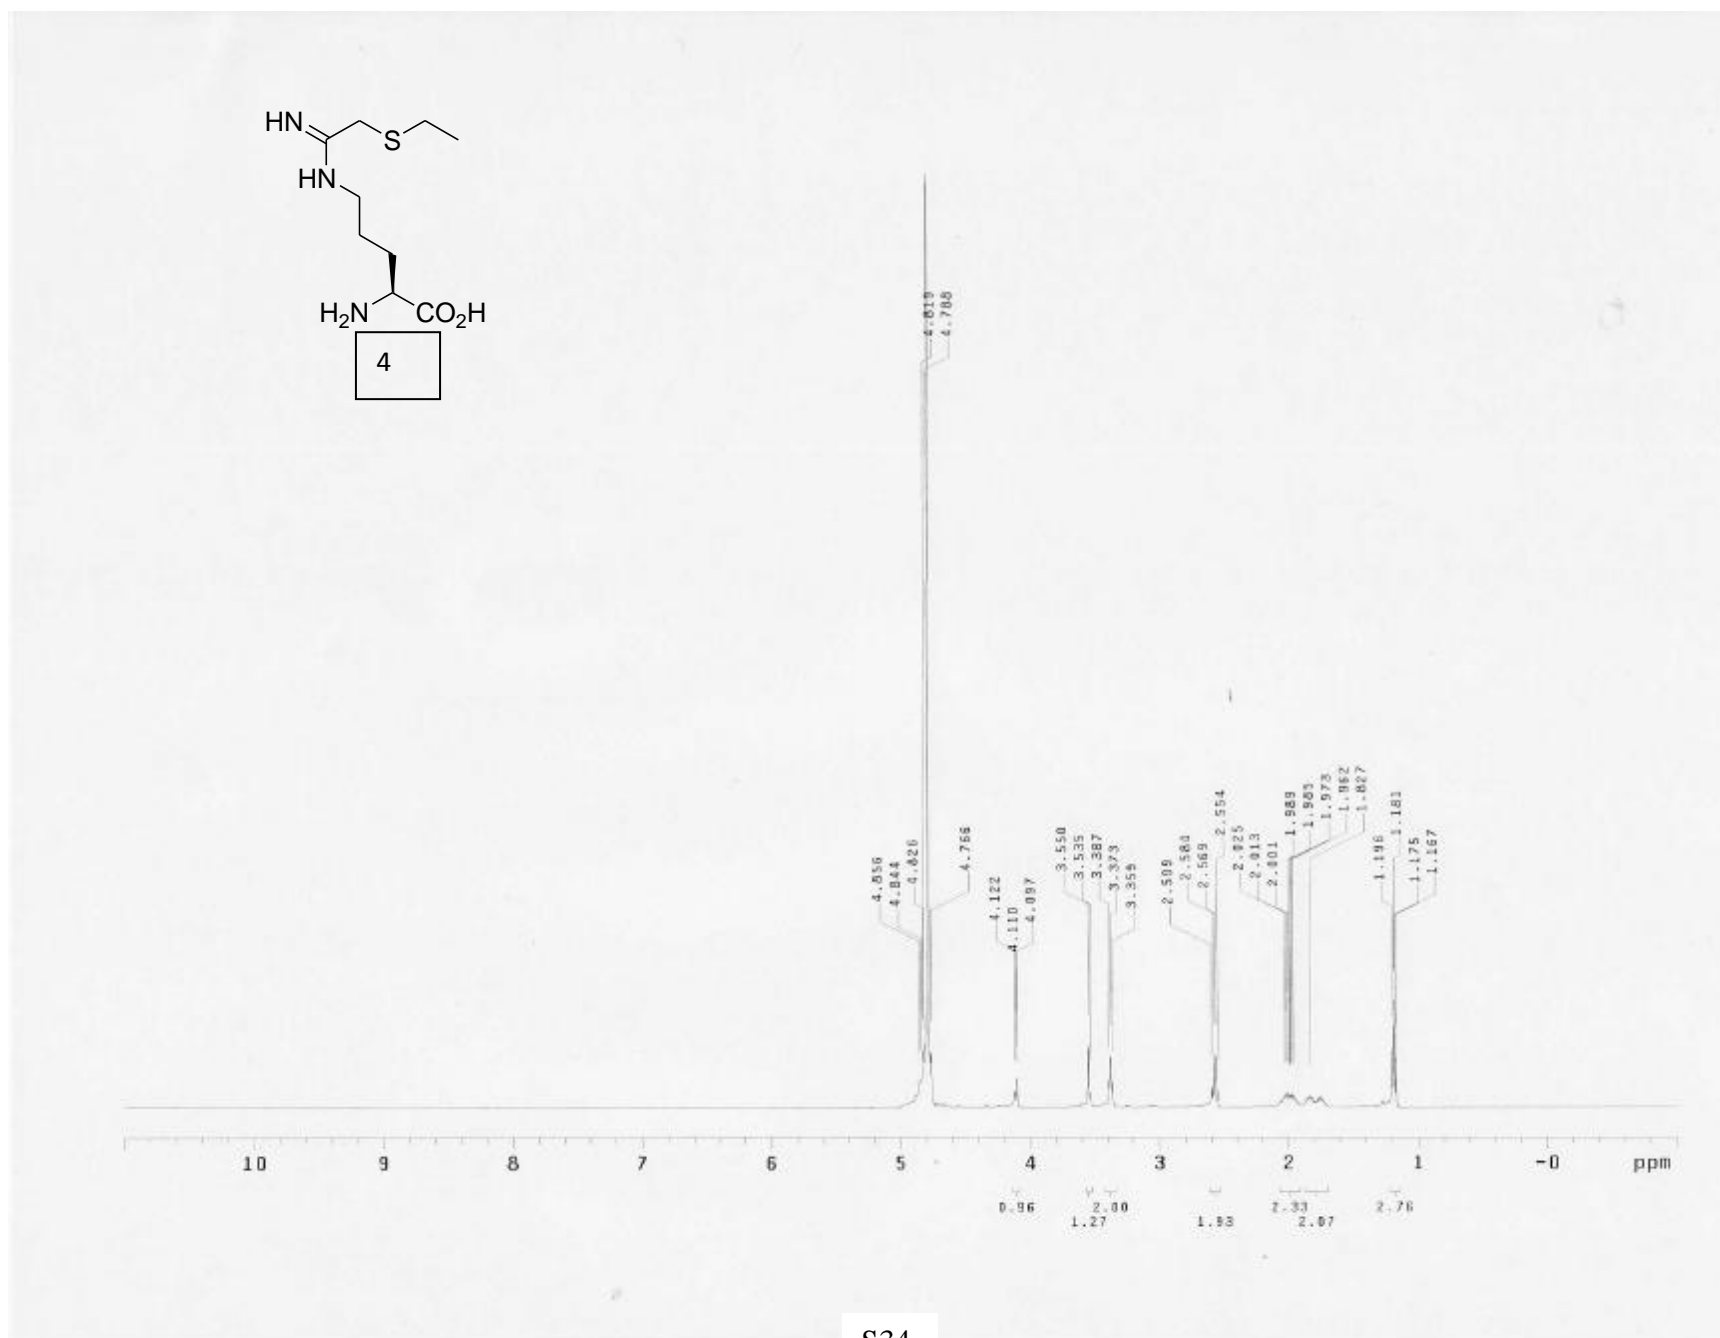

Supplementary Figure S6 continued

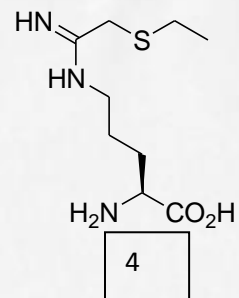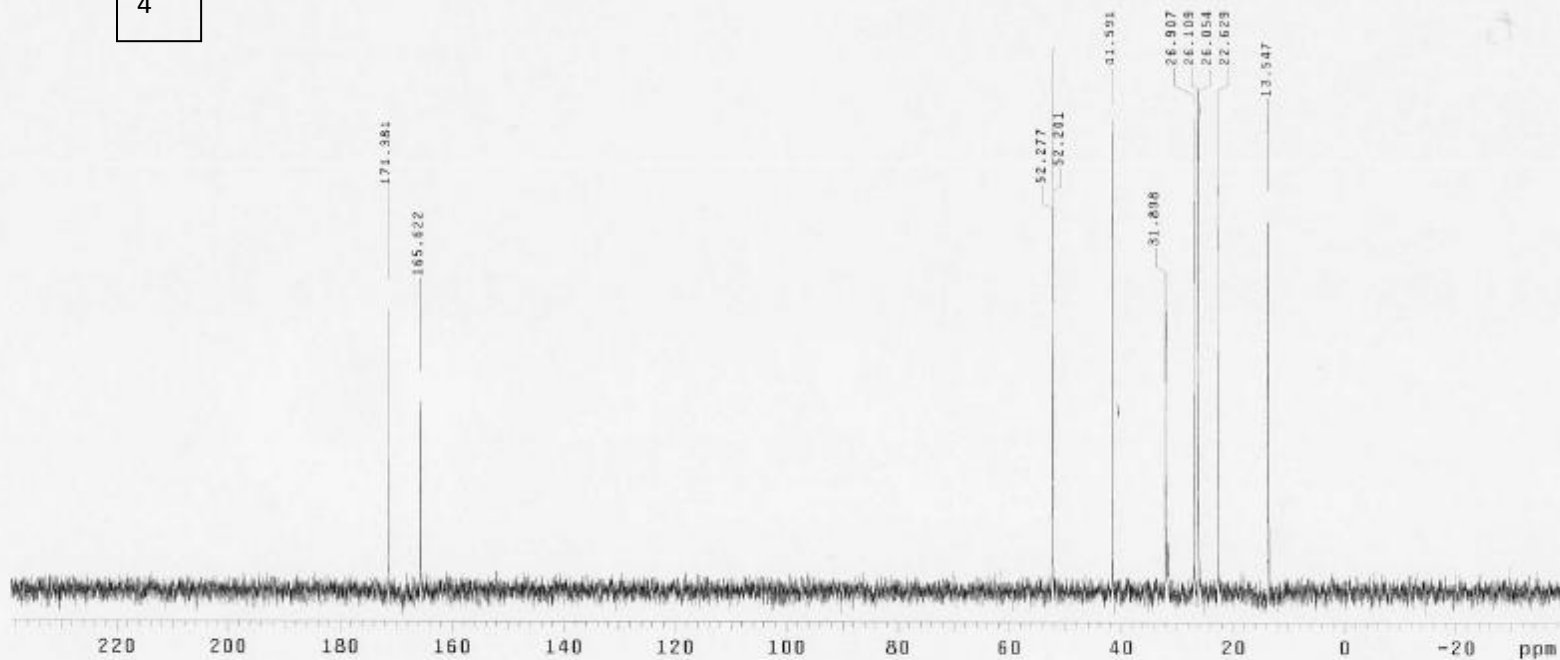

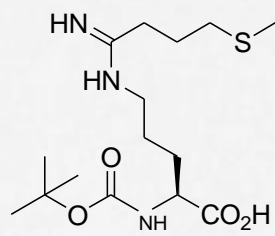

14

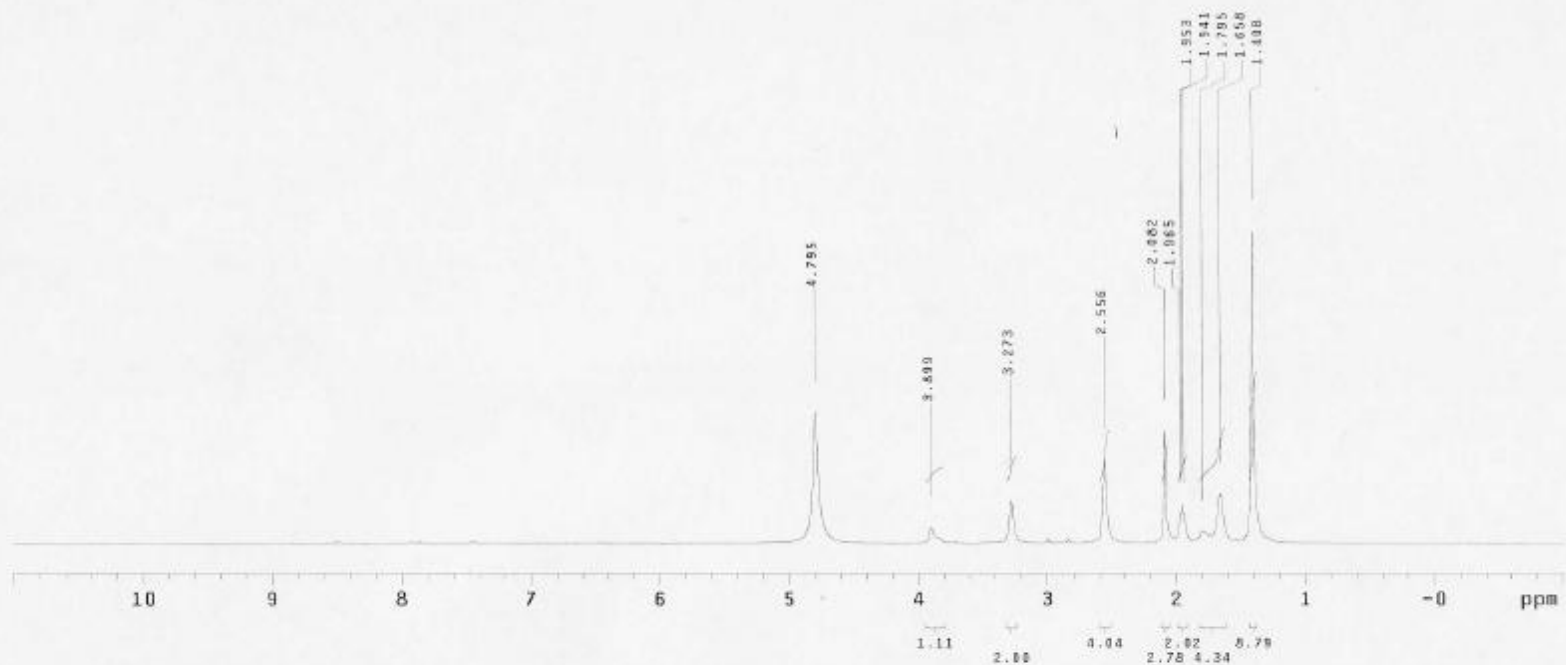

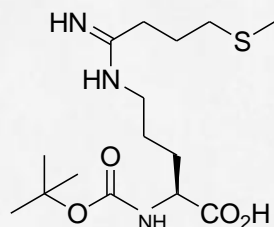

14

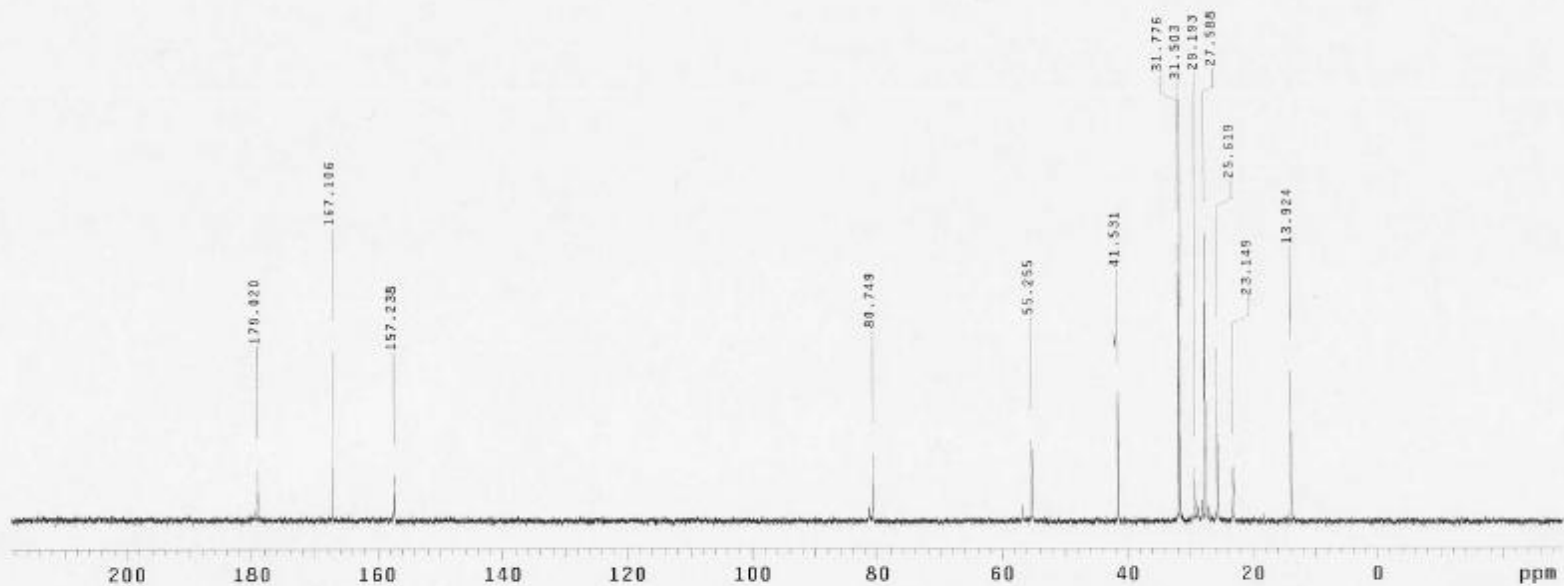

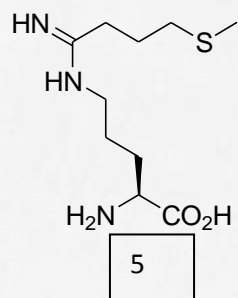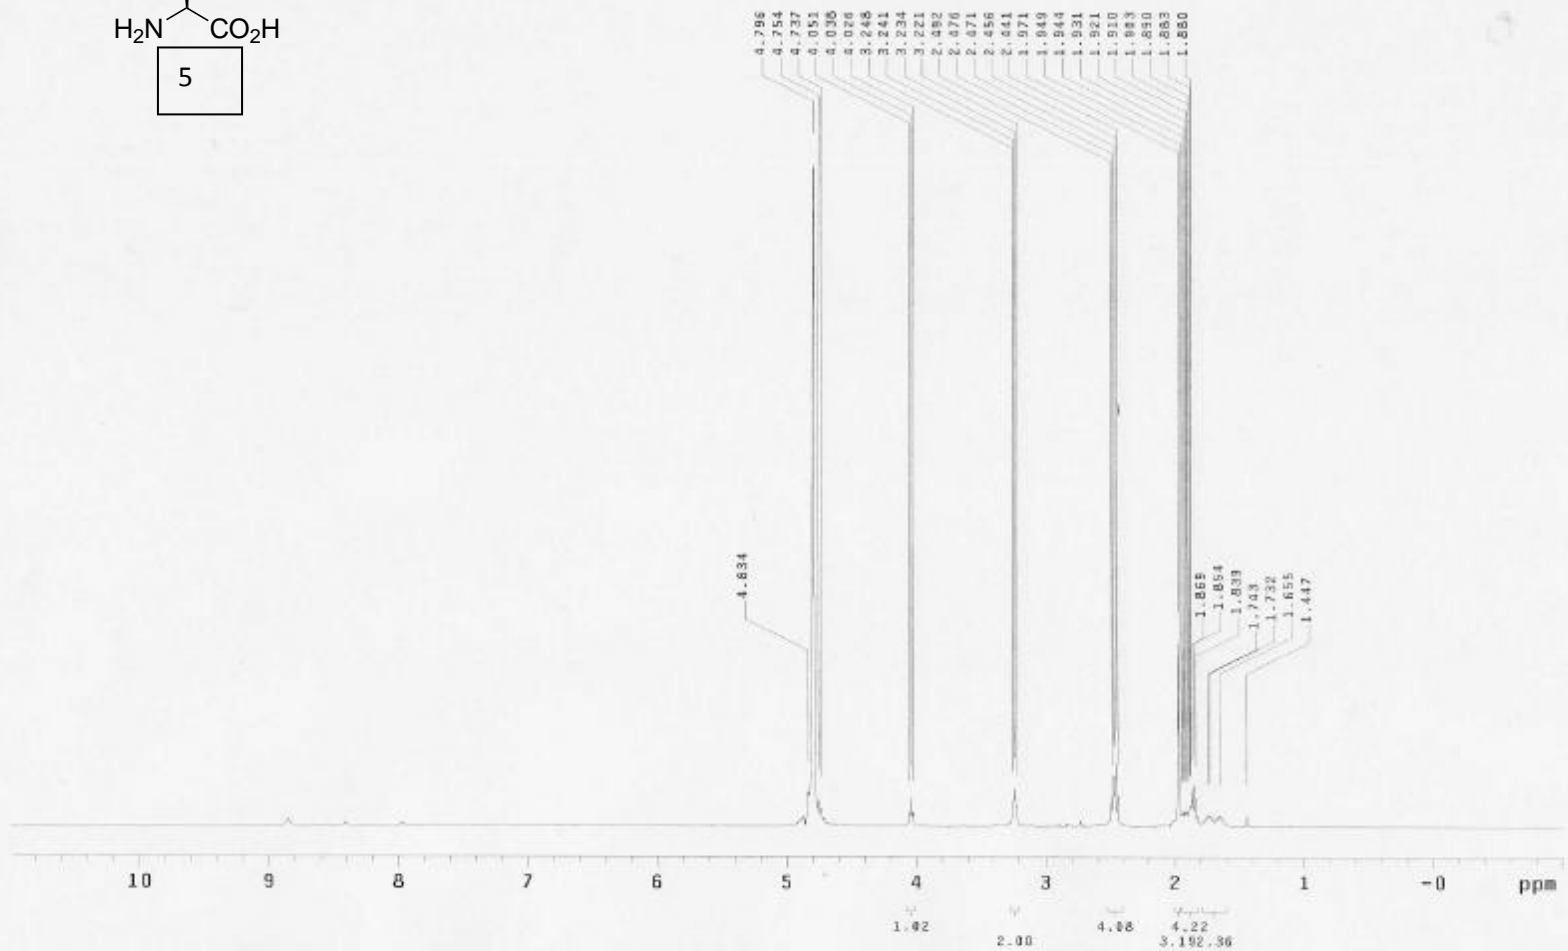

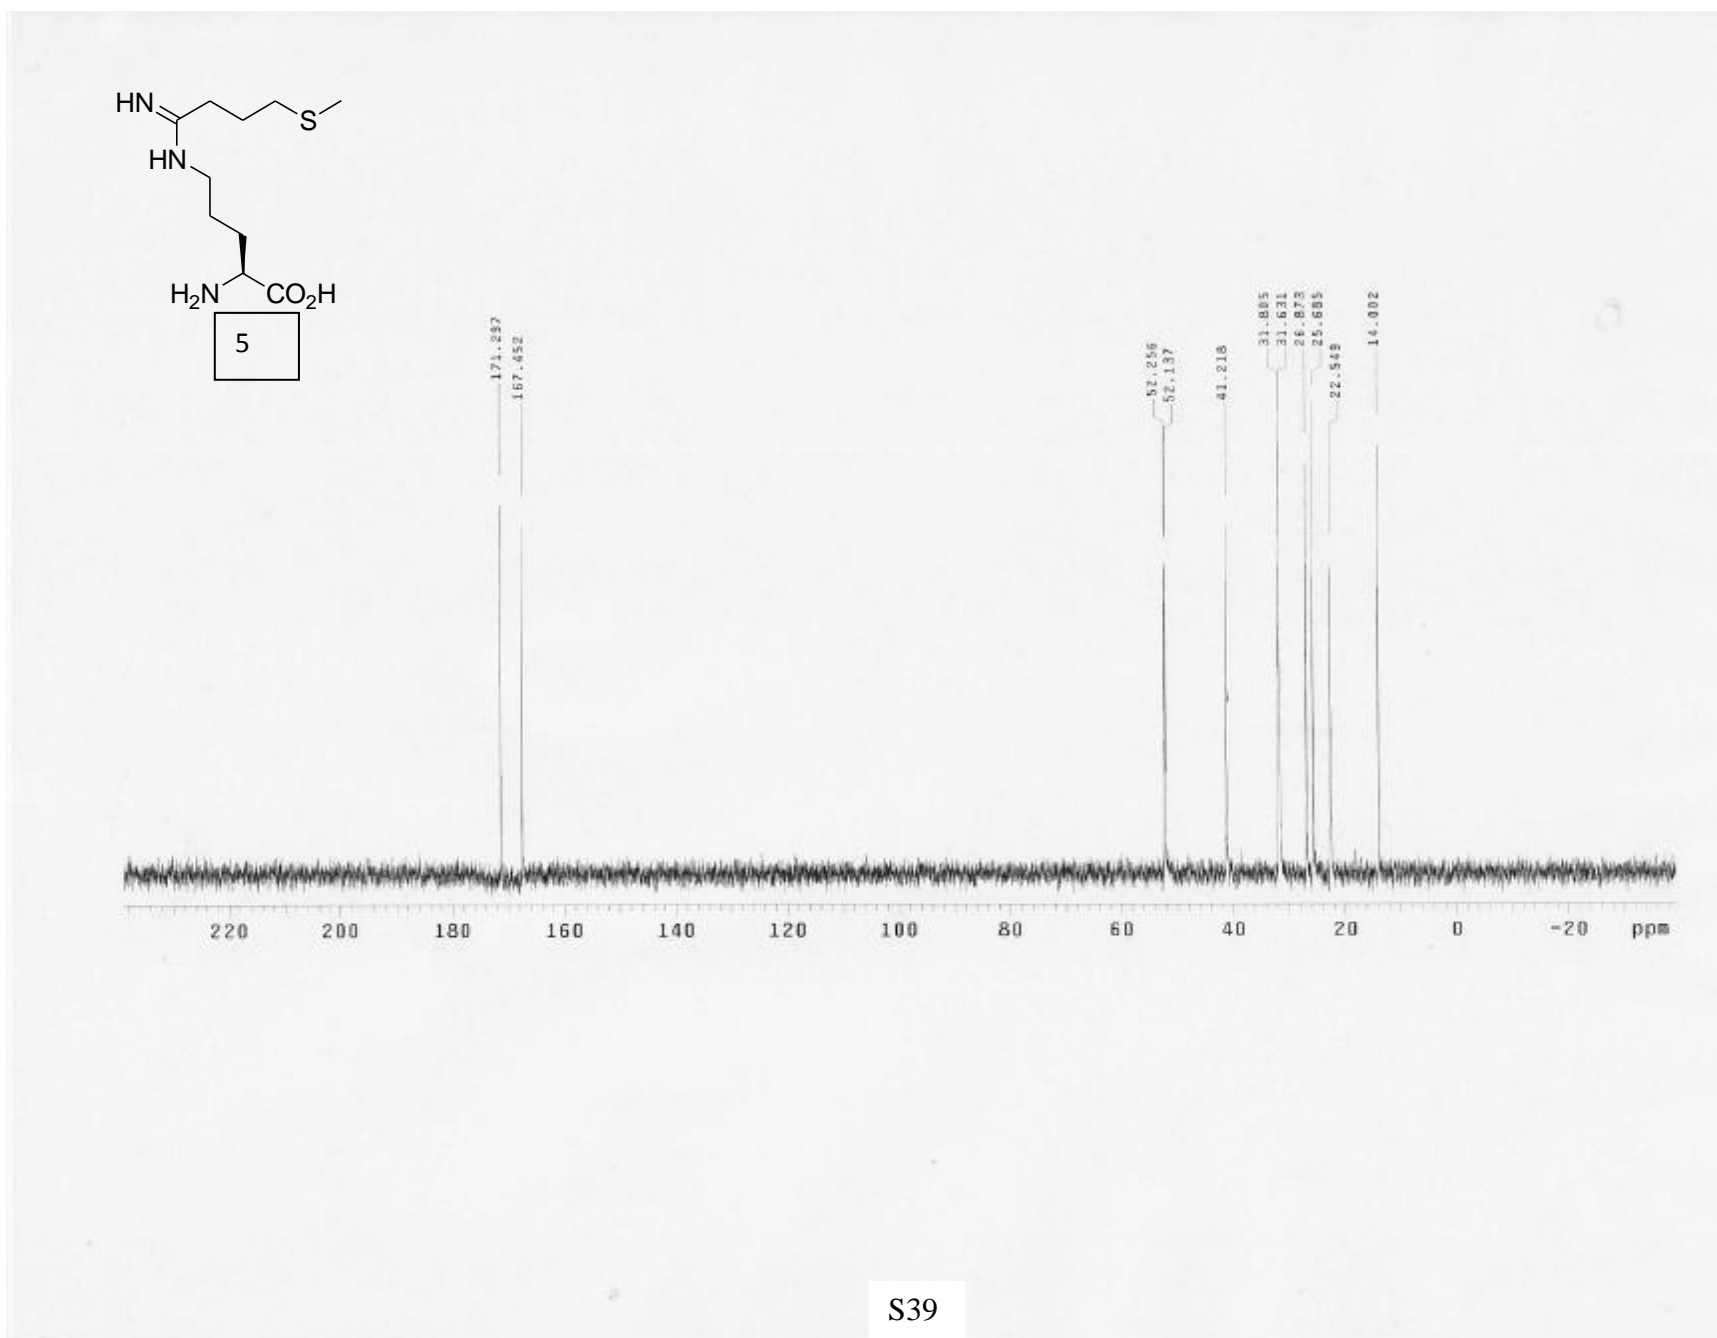

Supplementary Figure S6 continued

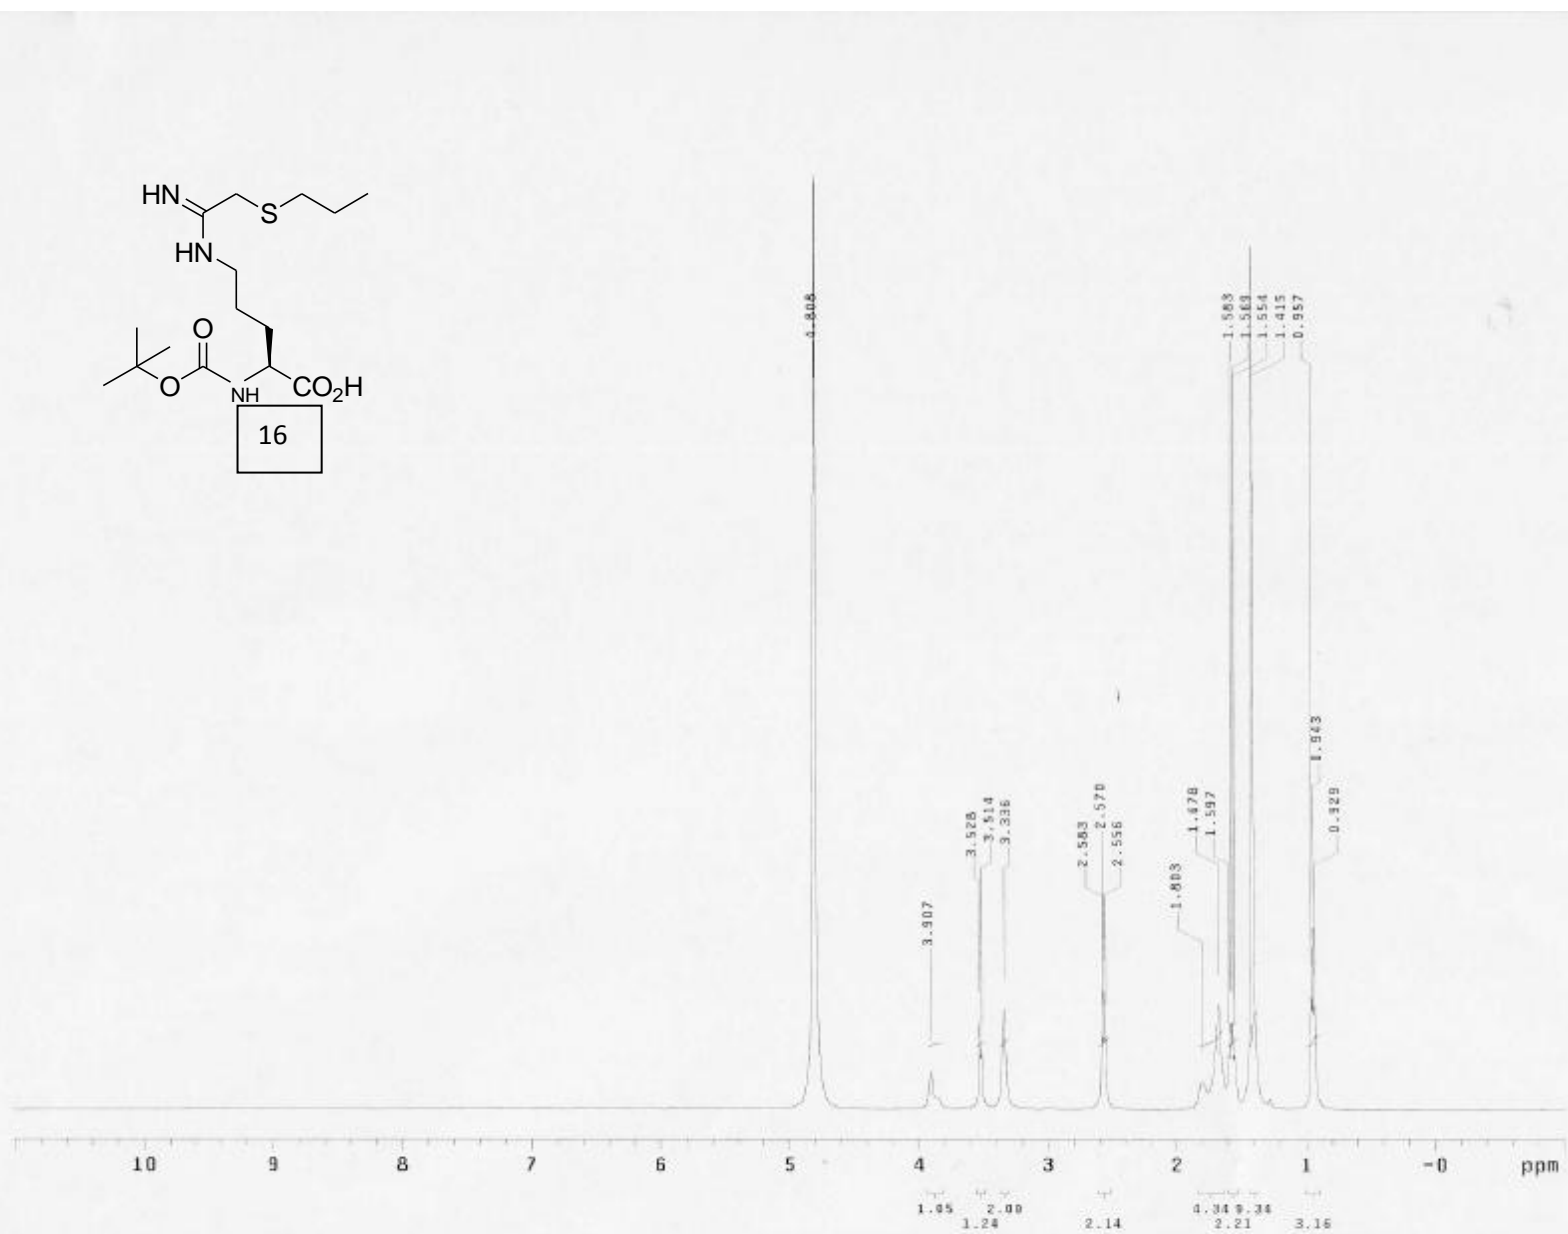

S40



Supplementary Figure S6 continued

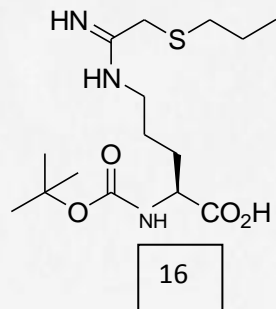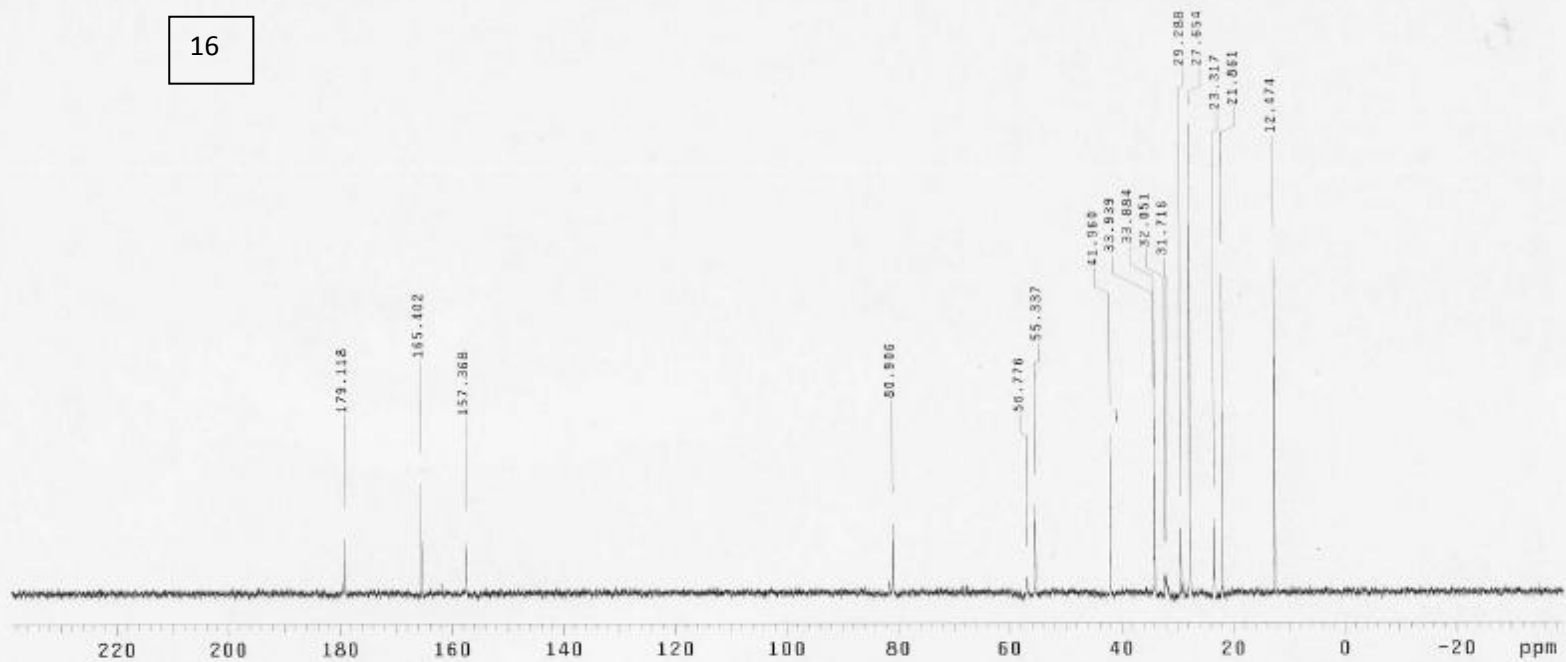

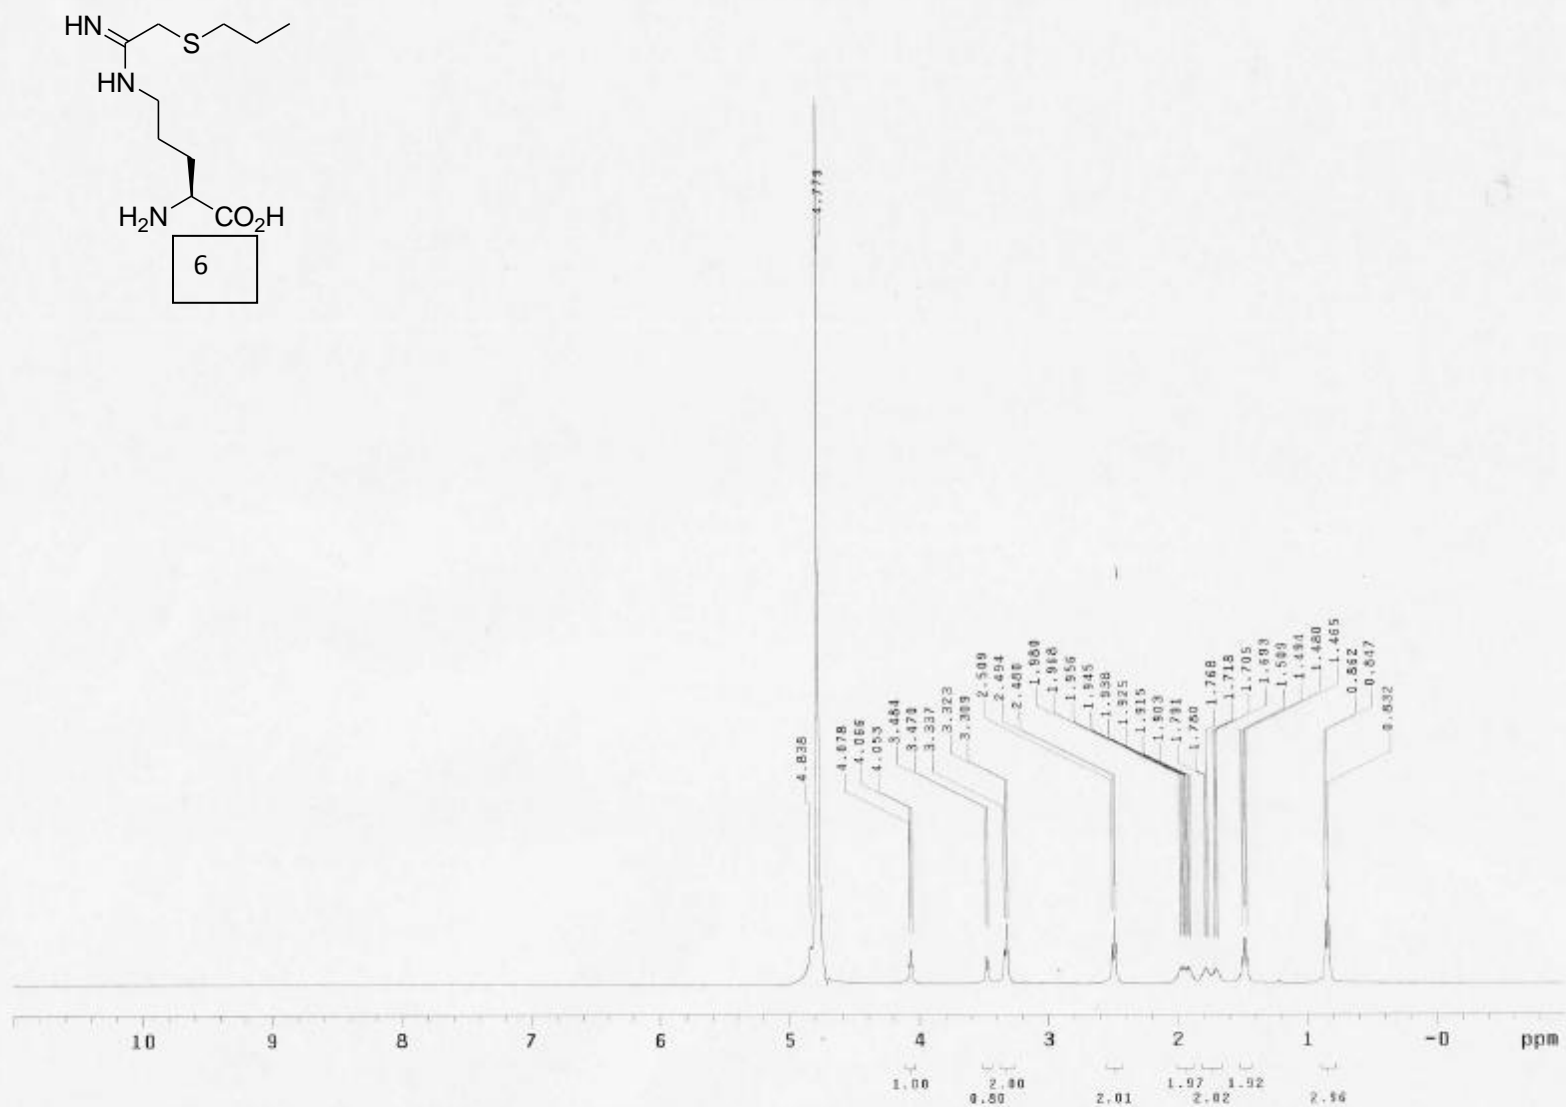

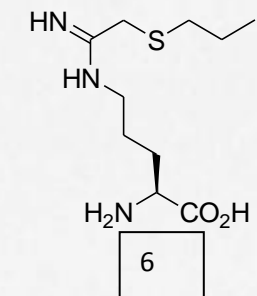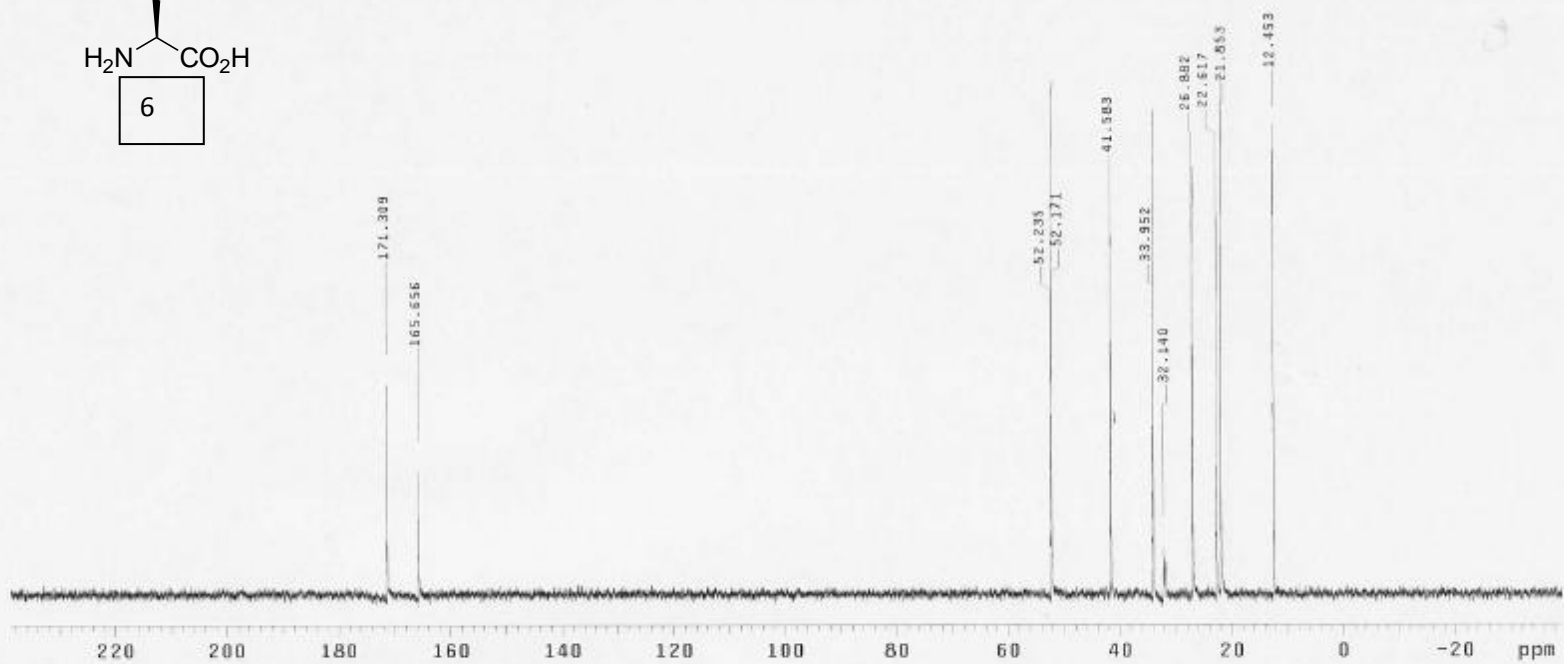

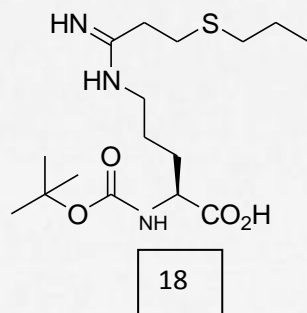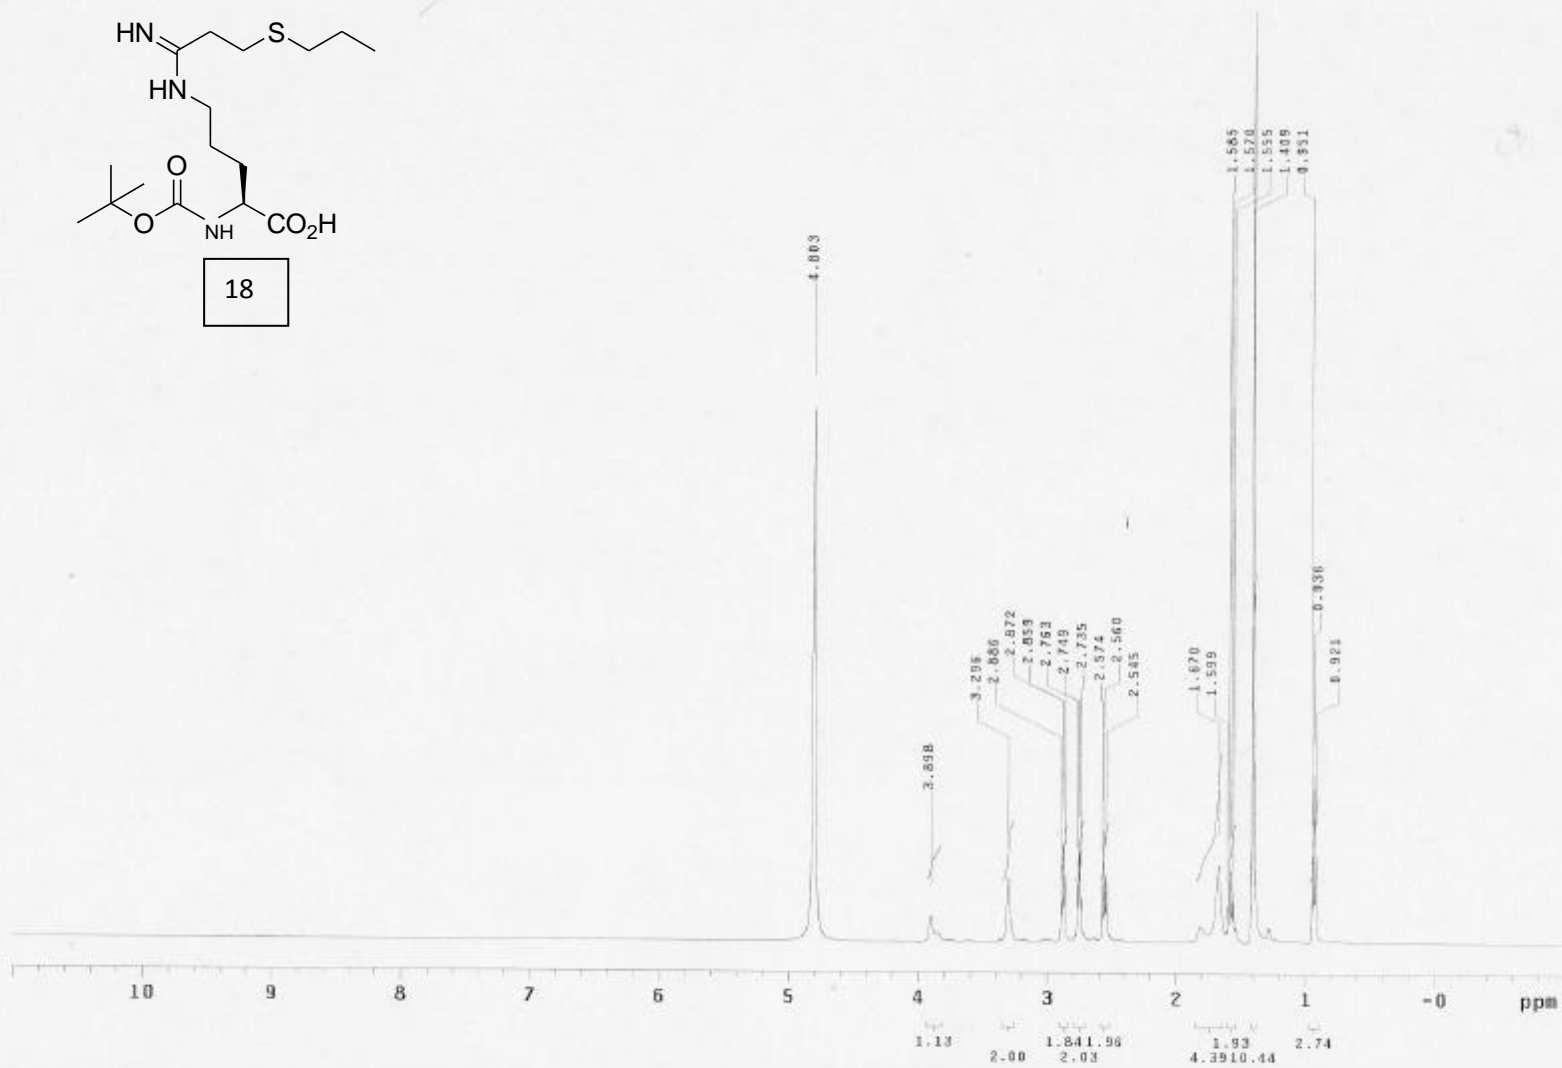

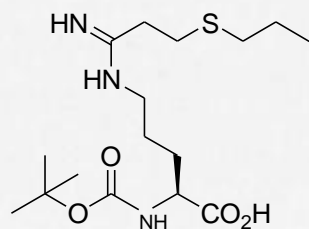

18

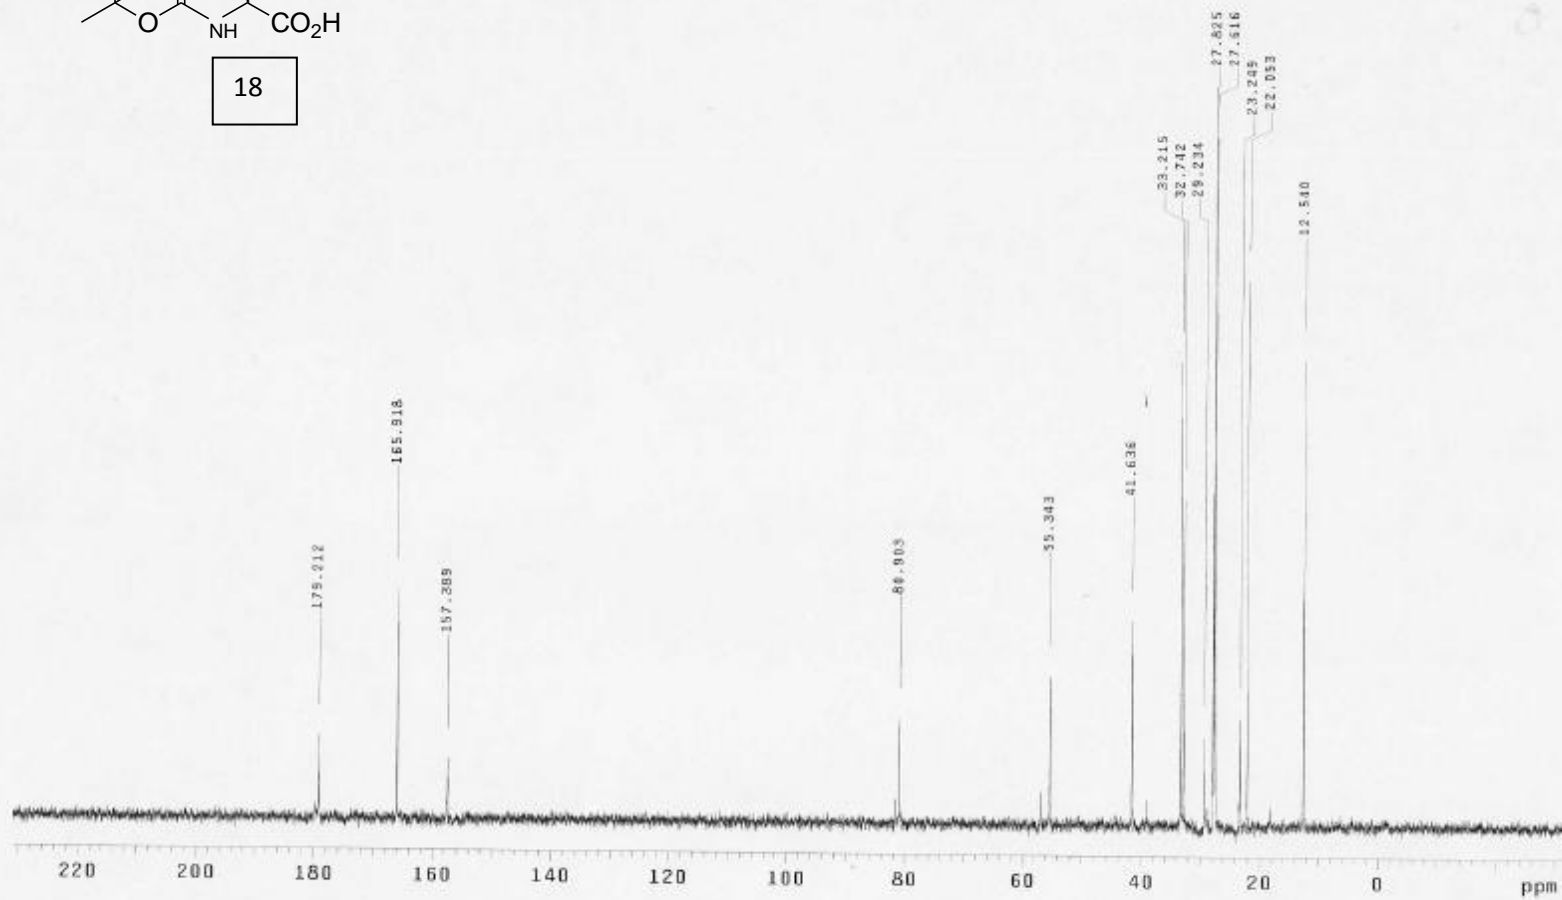

Supplementary Figure S6 continued

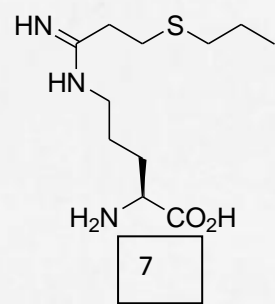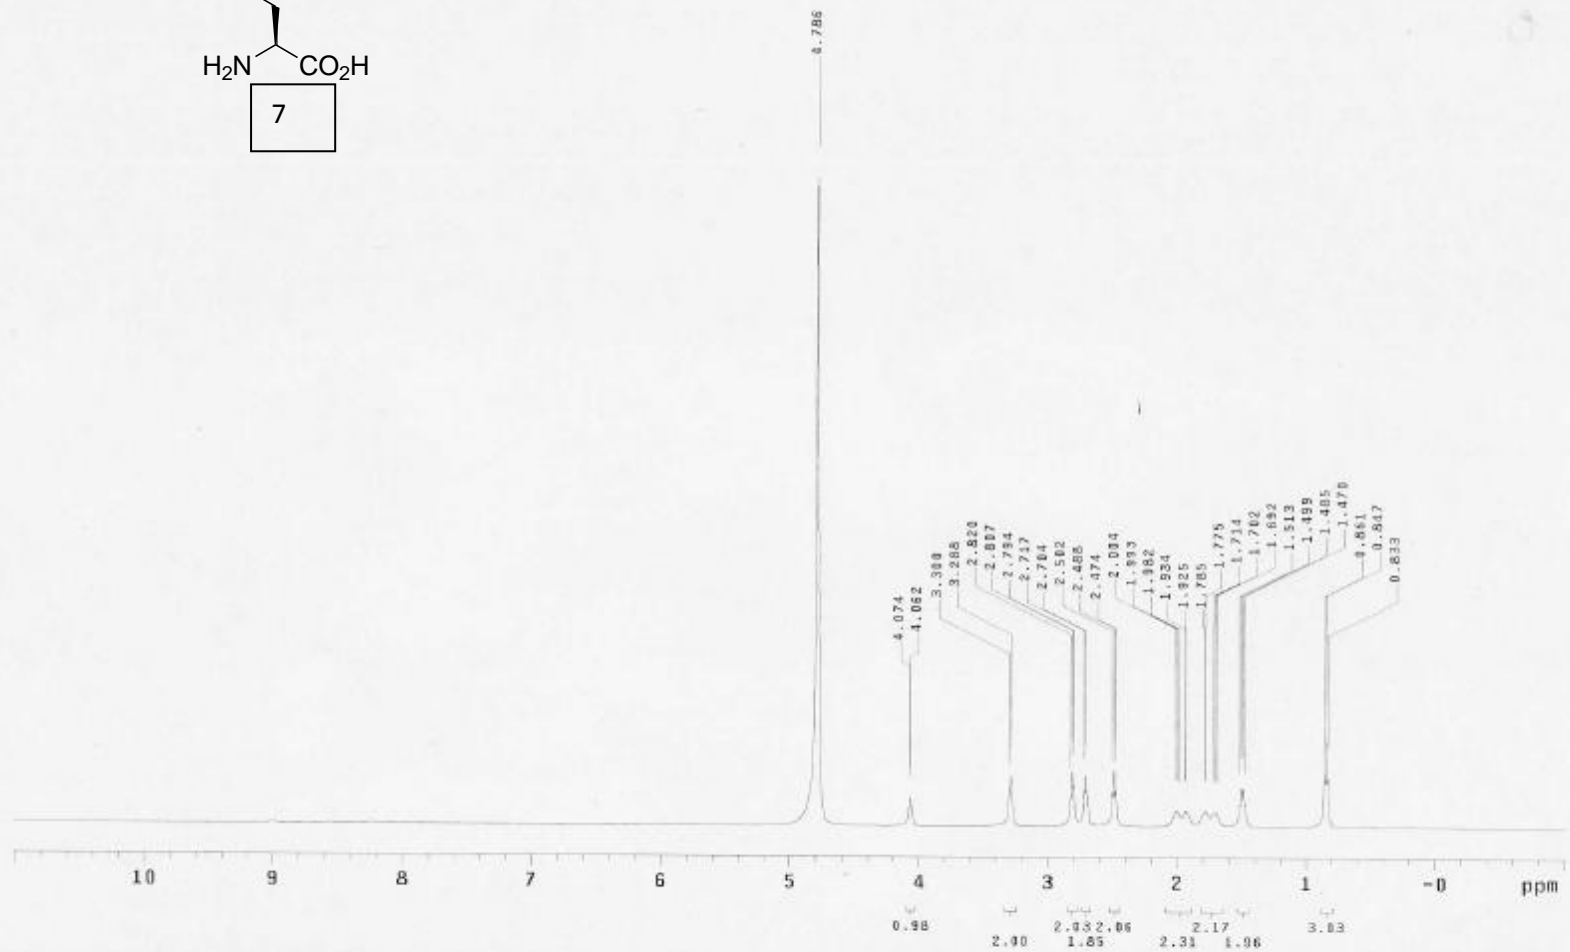

Supplementary Figure S6 continued

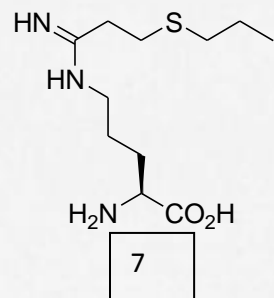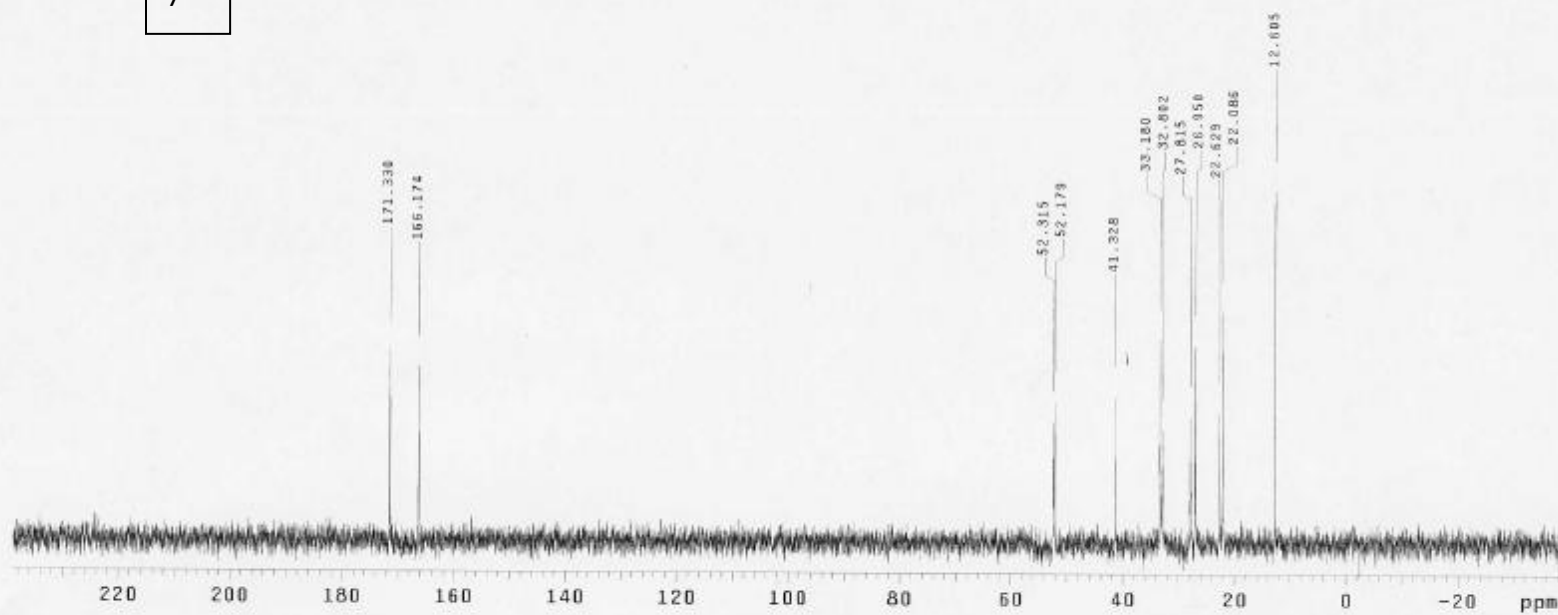

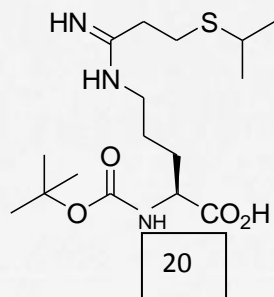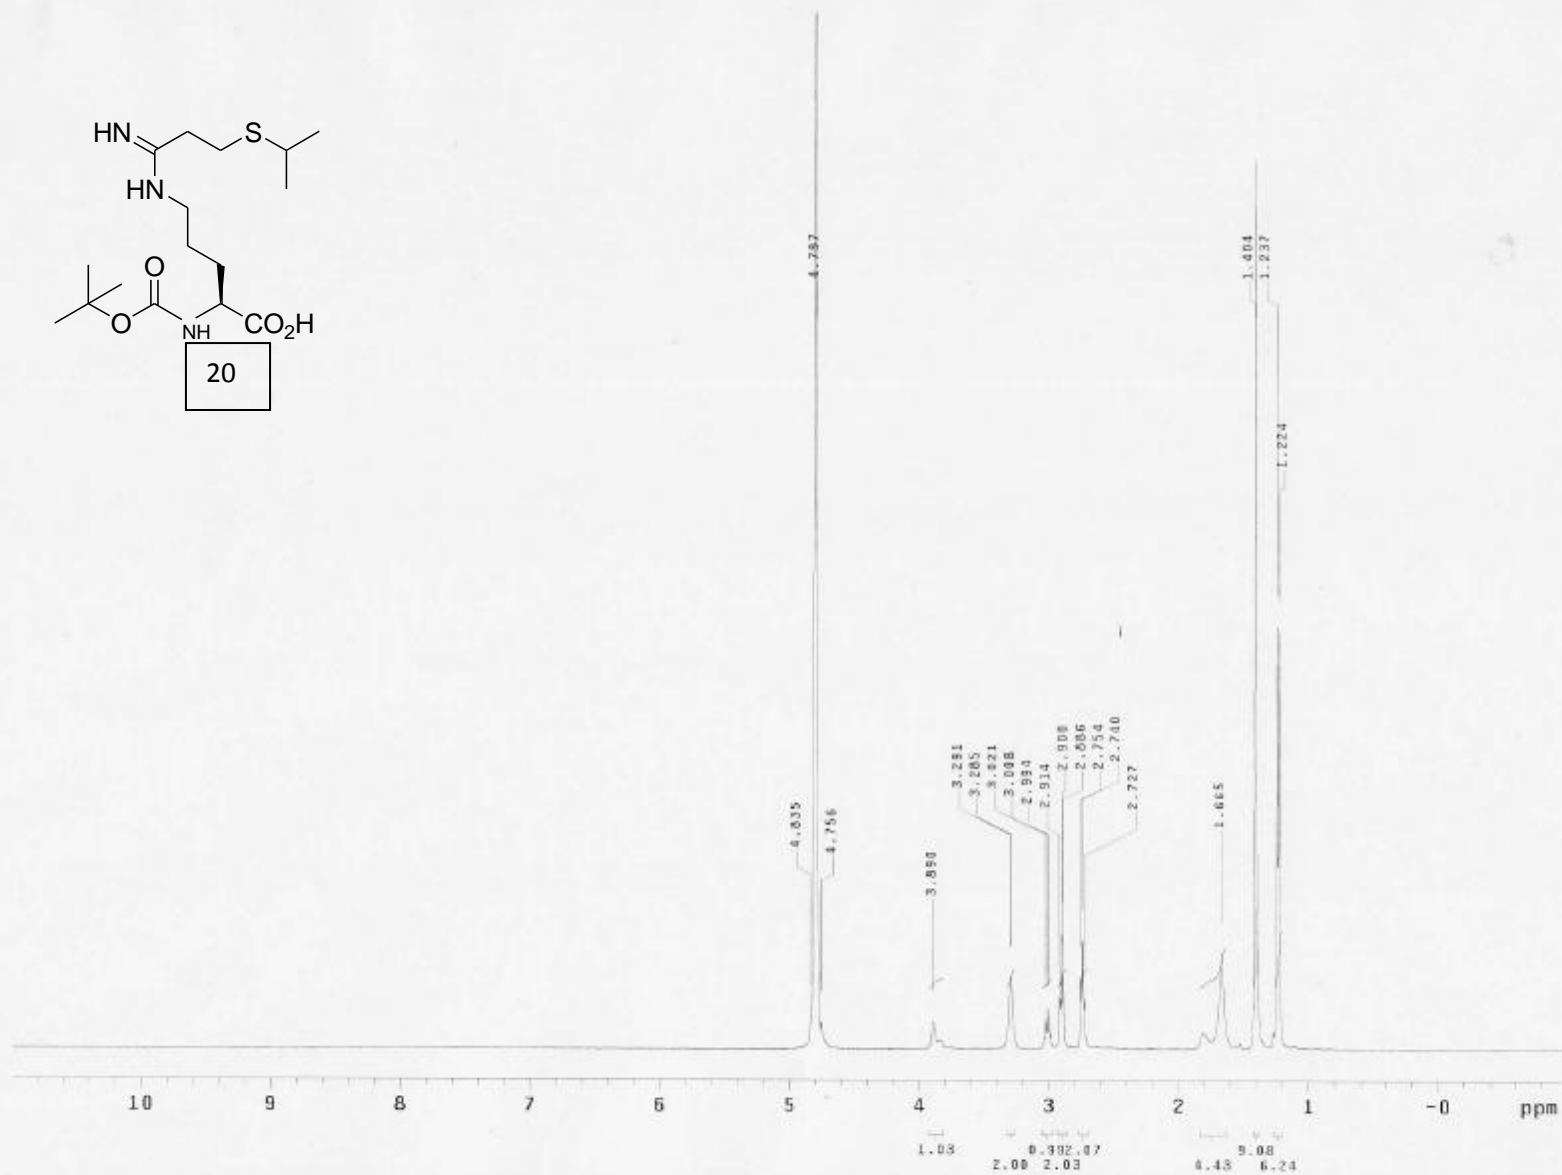



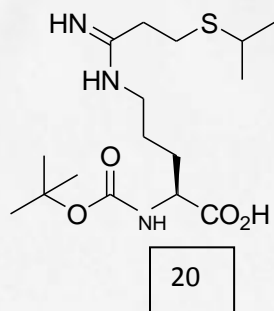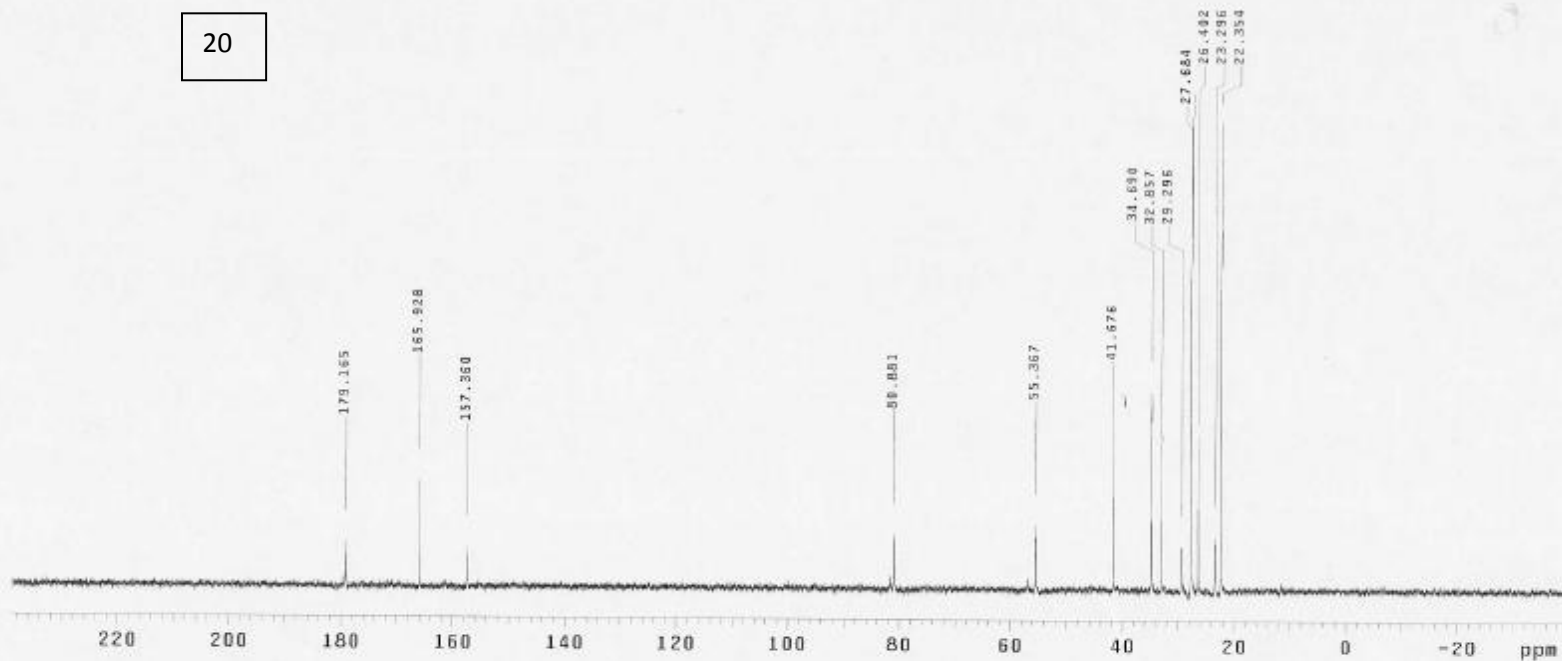

Supplementary Figure S6 continued

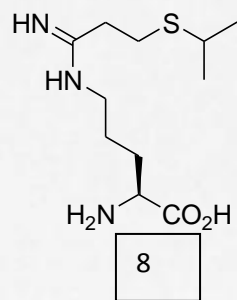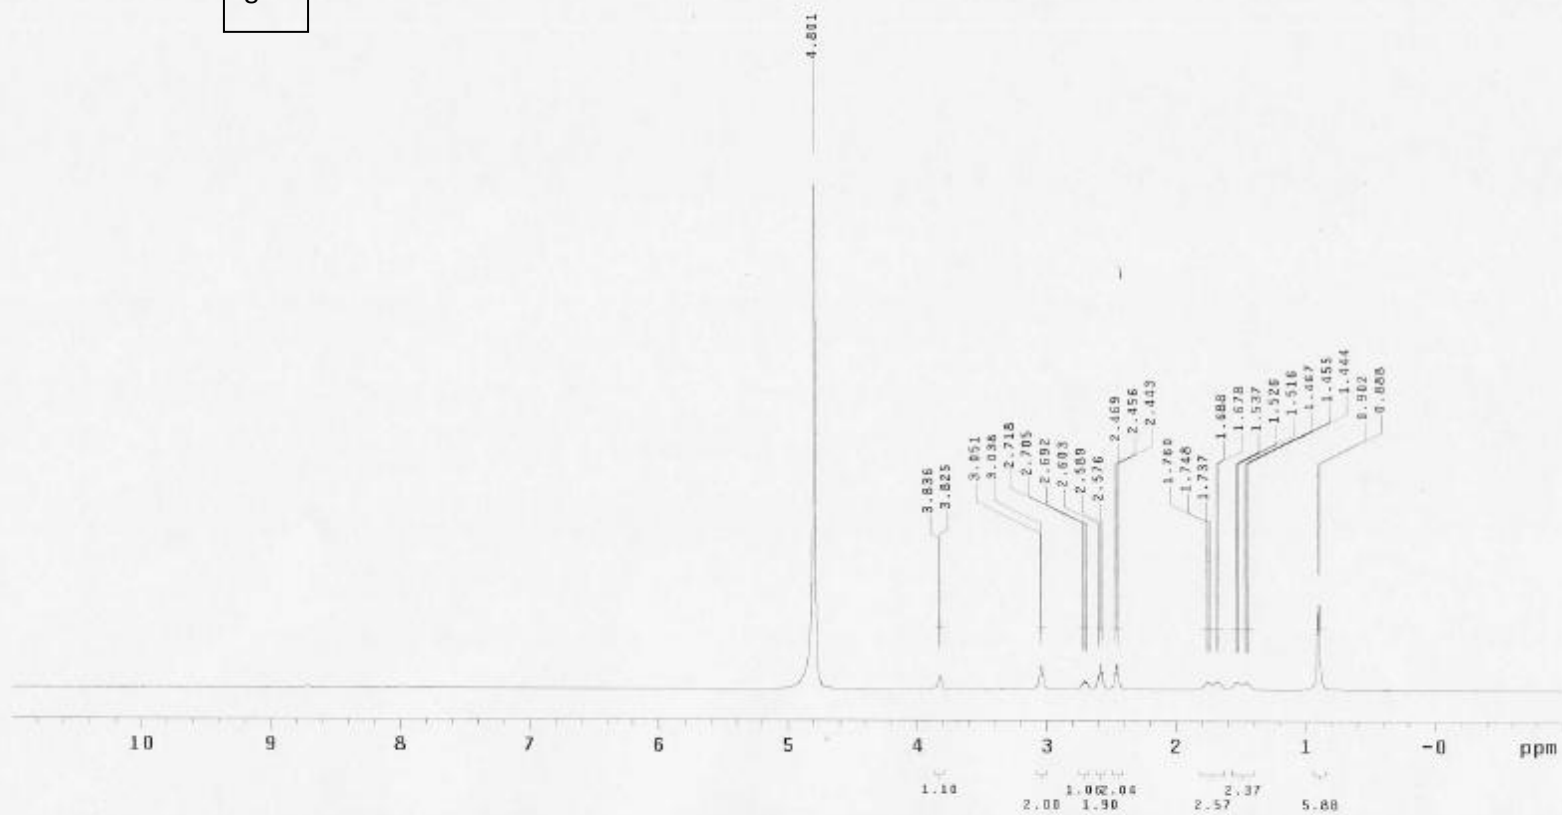

Supplementary Figure S6 continued

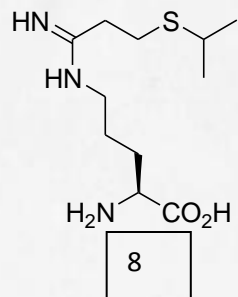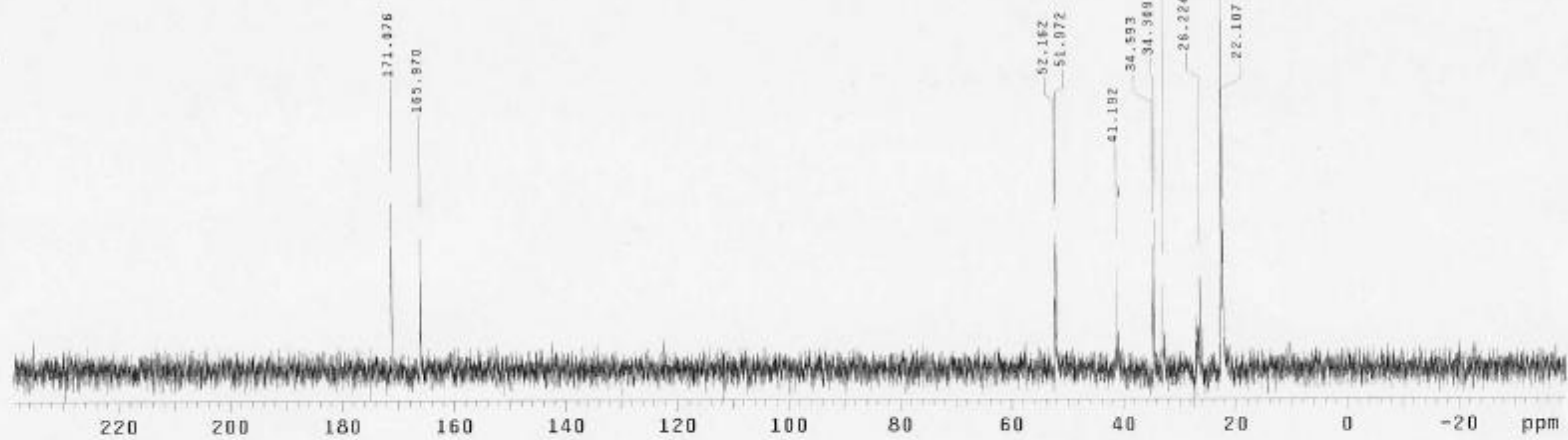

## References

1. Roman, L. J.; Sheta, E. A.; Martásek, P.; Gross, S. S.; Liu, Q.; Masters, B. S. S. High-level expression of functional rat neuronal nitric oxide synthase in escherichia coli. *Proc. Natl. Acad. Sci. U.S.A.* **1995**, *92*, 8428–8432.
2. For **4**, **6**, **12**, and **16**, the protons on the methylene group adjacent to the amidine moiety were found to exchange slowly with D<sub>2</sub>O, causing the integration to be too low. The fact that these protons did not give rise to singlets can be explained by amidine rotamers.
